# Supplementary material for: Catalyst-free ambient temperature synthesis of isoquinoline-fused benzimidazoles from 2-alkynylbenzaldehydes via alkyne hydroamination
Source: Royal Society of Chemistry journal article supplement (doi:10.1039/c8gc02520g), 2018-11-12

## SUPPORTING INFORMATION

for

### **Catalyst-free ambient temperature synthesis of isoquinoline-fused benzimidazoles from 2-alkynylbenzaldehydes via alkyne hydroamination**

by Manisha Mishra,<sup>a</sup> Dylan Twardy,<sup>b</sup> Clifford Ellstrom,<sup>a</sup> Kraig A. Wheeler,<sup>c</sup> Roman Dembinski<sup>b</sup> and Béla Török\*<sup>a</sup>

\* To whom correspondence should be addressed, email: [bela.torok@umb.edu](mailto:bela.torok@umb.edu); phone: 617-287-6159

<sup>a</sup> *Department of Chemistry, University of Massachusetts Boston, 100 Morrissey Blvd. Boston, MA 02125, USA.*

<sup>b</sup> *Department of Chemistry, Oakland University, 146 Library Drive, Rochester, MI 48309-4479, USA*

<sup>c</sup> *Department of Chemistry, Whitworth University, 300 W. Hawthorne Rd., Spokane, WA 99251, USA*

<sup>d</sup> *Centre of Molecular and Macromolecular Studies, Polish Academy of Sciences, Sienkiewicza 112, 90-363 Łódź, Poland*

Content:

- Synthetic procedure for compounds **4**
- <sup>1</sup>H and <sup>13</sup>C NMR spectra of compounds **3** and **5**

## Synthesis of substituted aldehydes 4:

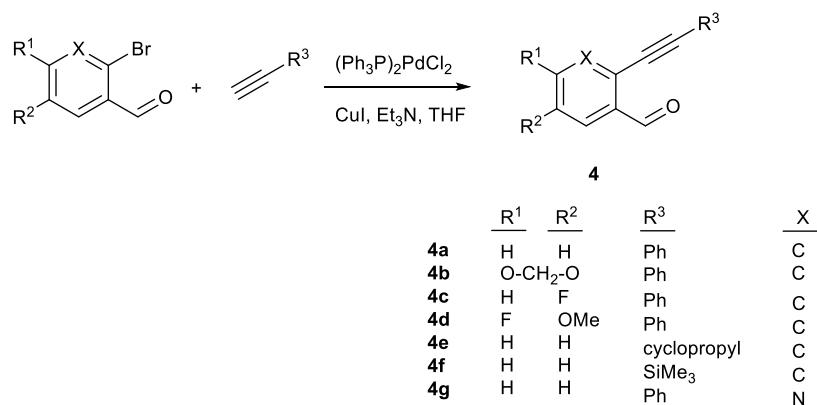

**Scheme SI 1.** Synthesis of substituted alkynylbenzaldehyde derivatives<sup>1</sup>

### General procedure for the synthesis of substituted aldehydes 4<sup>1</sup>:

A Schlenk flask (25 mL) equipped with a septum was charged with a 2-bromo-benzaldehyde (1.0 equiv), triethylamine (2.0 equiv), alkyne (1.2-1.4 equiv), and THF (7 mL). Nitrogen was purged through the solution via syringe needle for at least 15 min. Another Schlenk flask (25 mL), equipped with a reflux condenser, was charged with *trans*-dichlorobis(triphenylphosphine)palladium(II) (0.03 equiv), and copper iodide (0.05 equiv). The flask was evacuated and refilled with nitrogen, and the solution containing 2-bromo-benzaldehyde was added via syringe. The reaction mixture was stirred (magnetic stir bar) and heated at 70-80°C (50°C for **4g**) for 12 h. The solvent was removed by rotary evaporator and oil pump vacuum. Silica gel column chromatography (2 × 15 cm; hexanes/ethyl acetate 5-10%) gave usually colorless fractions. For **4d**, recrystallization from ethyl acetate gave crystals that were used for analysis. The spectral data of 2-(phenylethynyl)benzaldehyde (**4a**),<sup>2,3</sup> 6-(phenylethynyl)benzo[*d*][1,3]dioxole-5-carbaldehyde (or 6-phenylethynylpiperonal) (**4b**),<sup>4</sup> 5-fluoro-2-(phenylethynyl)benzaldehyde (**4c**)<sup>5</sup> 2-(cyclopropylethynyl)benzaldehyde (**4e**),<sup>6</sup> 2-(phenylethynyl)nicotinaldehyde (**4g**),<sup>6</sup> were in agreement with those reported in literature.

**5-Fluoro-4-methoxy-2-(phenylethynyl)benzaldehyde (4d):** yield: 45%; colorless solid, mp: 121-125 °C; <sup>1</sup>H NMR: (CDCl<sub>3</sub>, 400 MHz): δ(ppm) = 3.97 (3H, s), 7.35 (1H, d, *J* = 11.0 Hz), 7.37-7.41 (3H, m), 7.51 (1H, part of d, second line obscured), 7.53-7.57 (2H, m), 10.54 (1H, s). <sup>13</sup>C NMR: (CDCl<sub>3</sub>, 100 MHz): δ(ppm) = 56.51, 83.73 (d, *J* = 2.8 Hz), 95.98, 111.00 (d, *J* = 3.8 Hz), 120.38 (d, *J* = 20.5 Hz), 121.01 (d, *J* = 9.6 Hz), 122.33, 128.72(2C), 129.28, 131.78(2C), 133.26 (d, *J* = 2.9 Hz), 148.89 (d, *J* = 11.4 Hz), 155.71 (d, *J* = 258.1 Hz), 190.39. IR (ν, cm<sup>-1</sup>): 3369, 3081, 3020, 2973, 2939, 2852, 2760, 2393, 2213, 2081, 1782, 1692, 1610, 1566; HRMS: (ESI-TOF) [M + H]<sup>+</sup> calcd for C<sub>16</sub>H<sub>12</sub>FO<sub>2</sub> 255.0816, found 255.0817.

### References for the synthesis and characterization of compounds 4:

- [1] S. Zhu, H. Huang, Z. Zhang, T. Ma, H. Jiang, *J. Org. Chem.*, 2014, **79**, 6113.
- [2] G. Dyker, W. Stirner and G. Henkel, *Eur. J. Org. Chem.*, 2000, 1433.
- [3] K. R. Roesch, R. C. Larock, *J. Org. Chem.*, 2002, **67**, 86.
- [4] I. Cikotiene, R. Buksnaitiene, R. Sazinas, *Tetrahedron*, 2011, **67**, 706.
- [5] Z. Chai, Z. Xie, X. Liu, G. Zhao, J. Wang, *J. Org. Chem.*, 2008, **73**, 2947.
- [6] J. Park, S. Bhilare, S. Youn, *Org. Lett.*, 2011, **13**, 2228.

**$^1\text{H}$  and  $^{13}\text{C}$  NMR spectra of compounds 3 and 5**

### <sup>1</sup>H NMR of **3c**

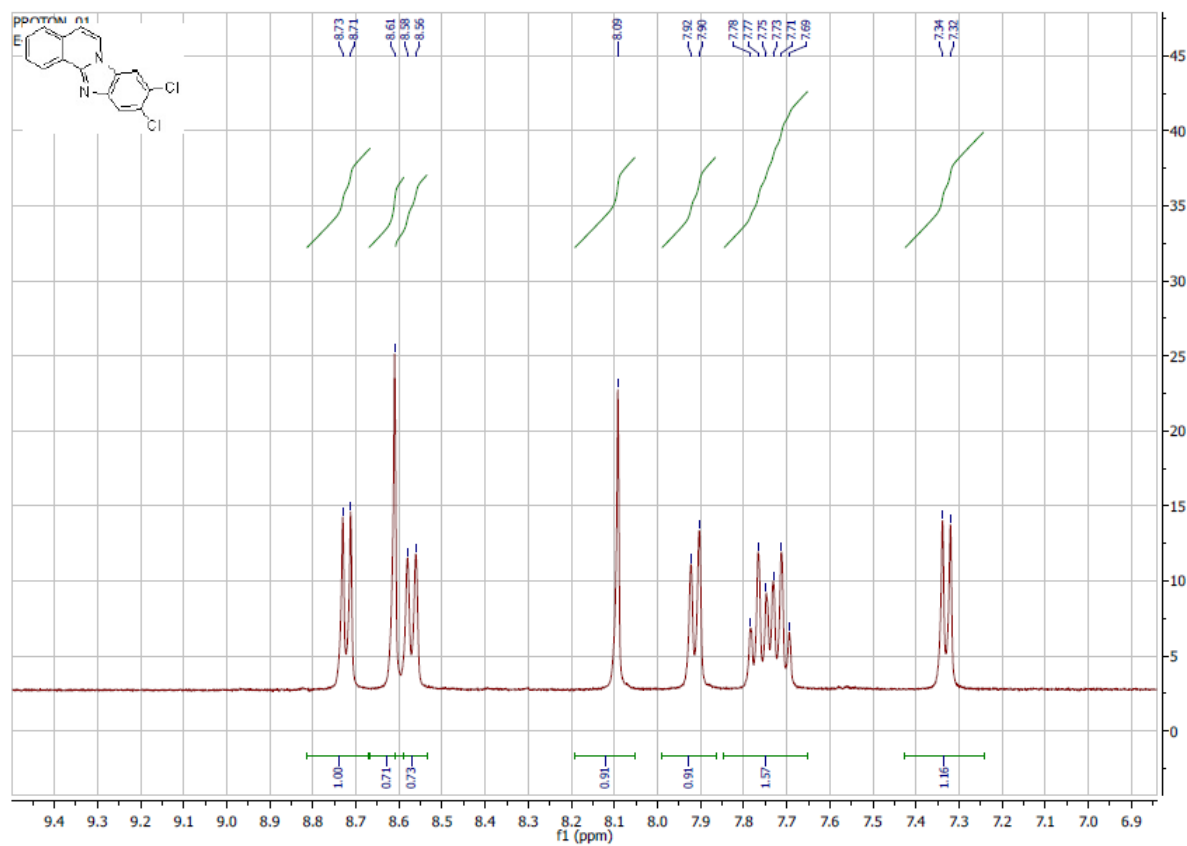

### <sup>13</sup>C NMR of **3c**

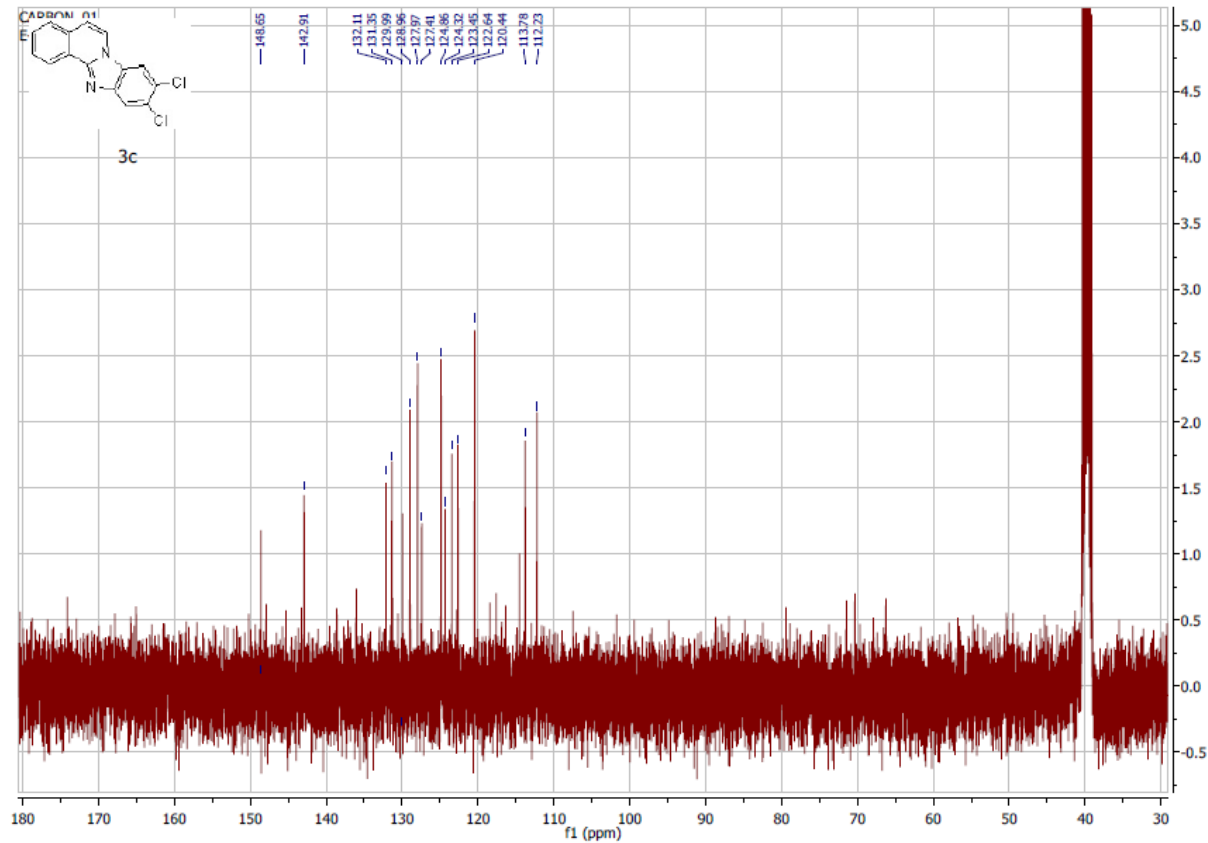

### <sup>1</sup>H NMR of **3d**

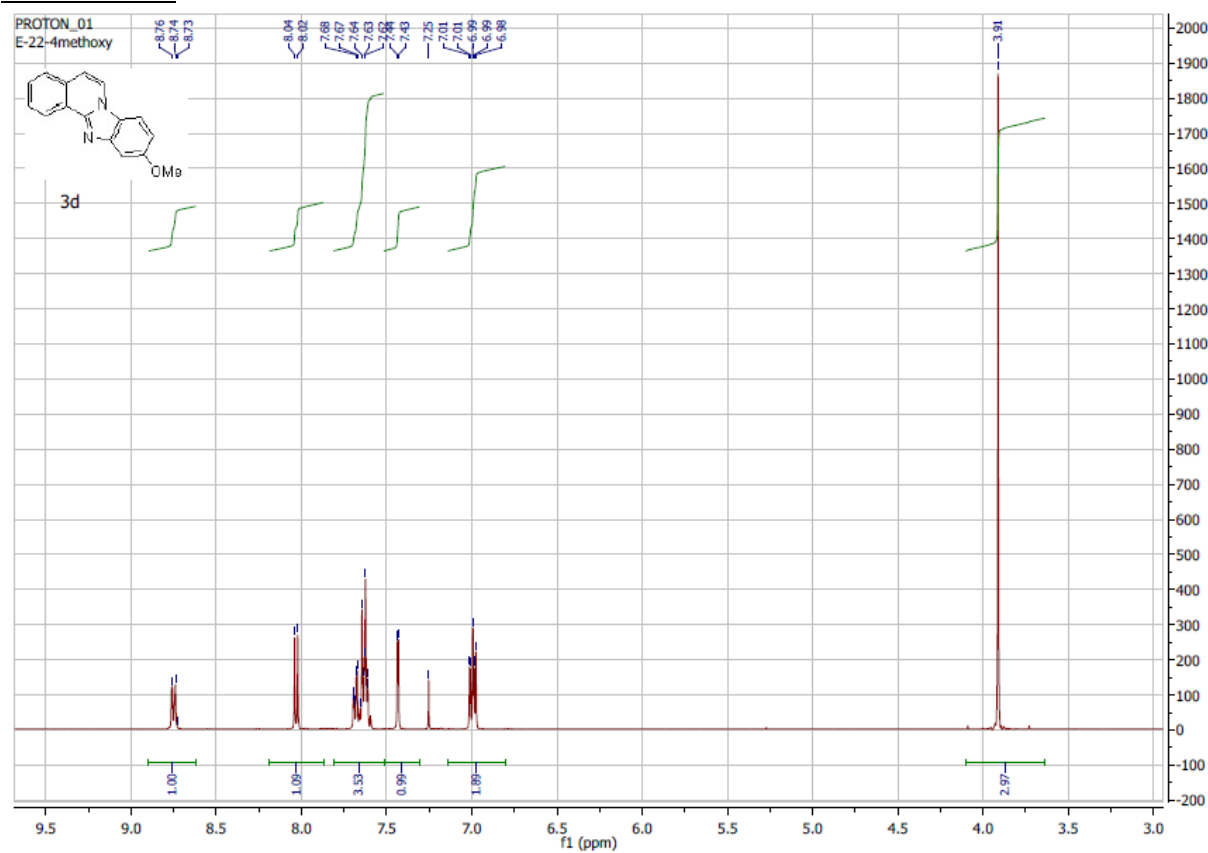

### <sup>13</sup>C NMR of **3d**

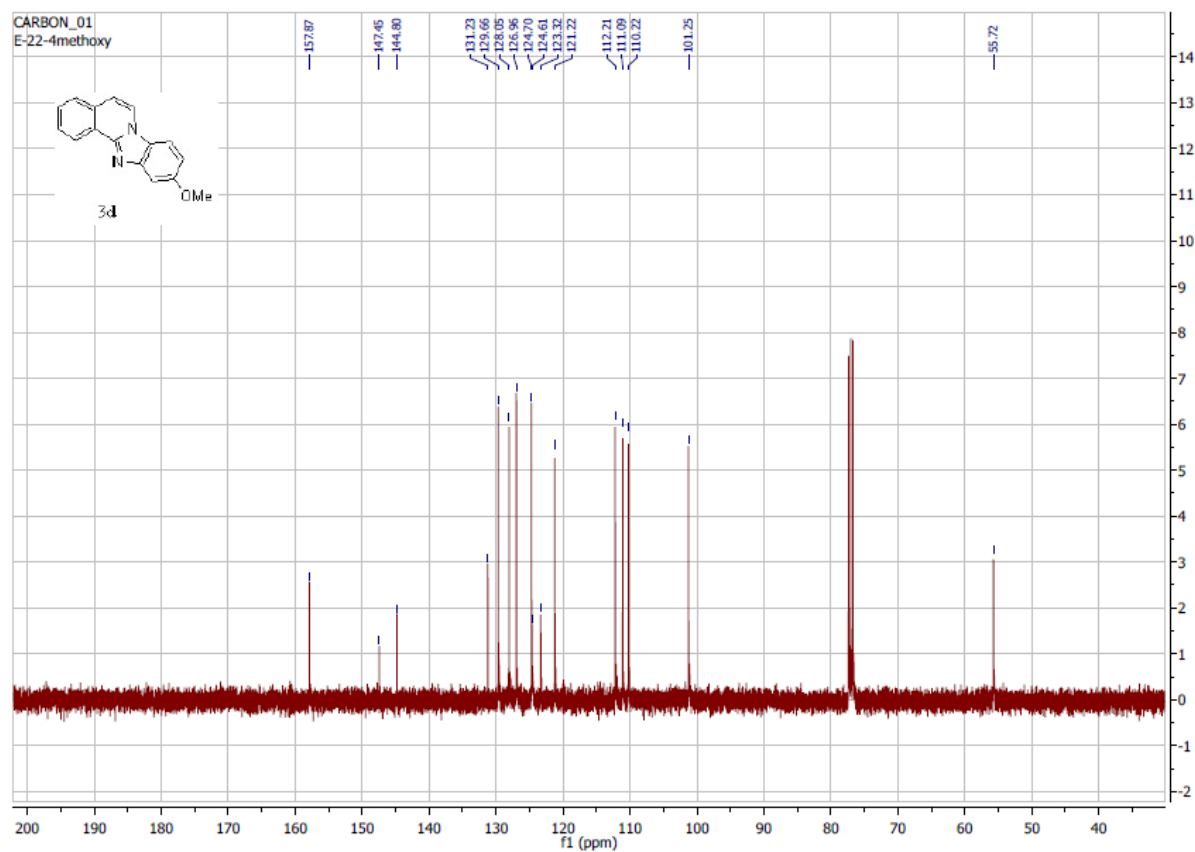

### <sup>1</sup>H NMR of **3e**

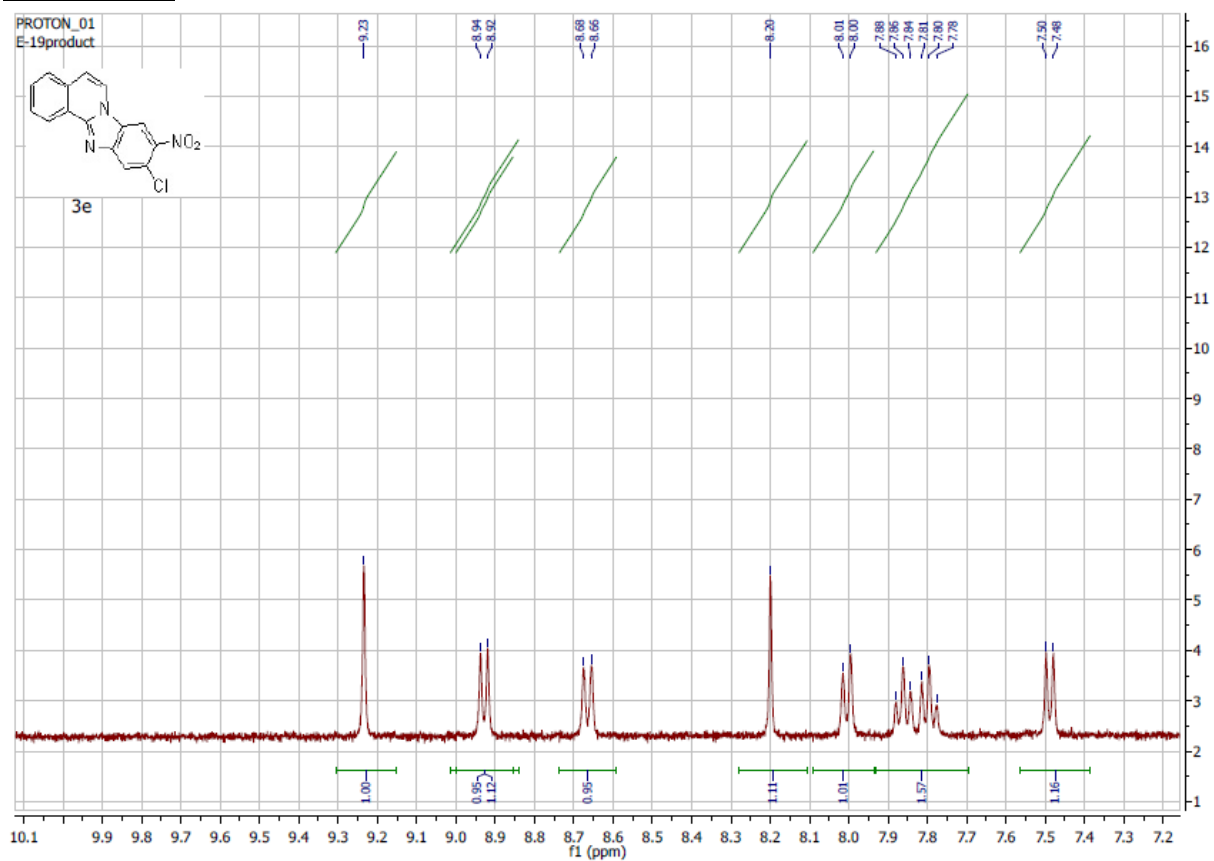

### <sup>13</sup>C NMR of **3e**

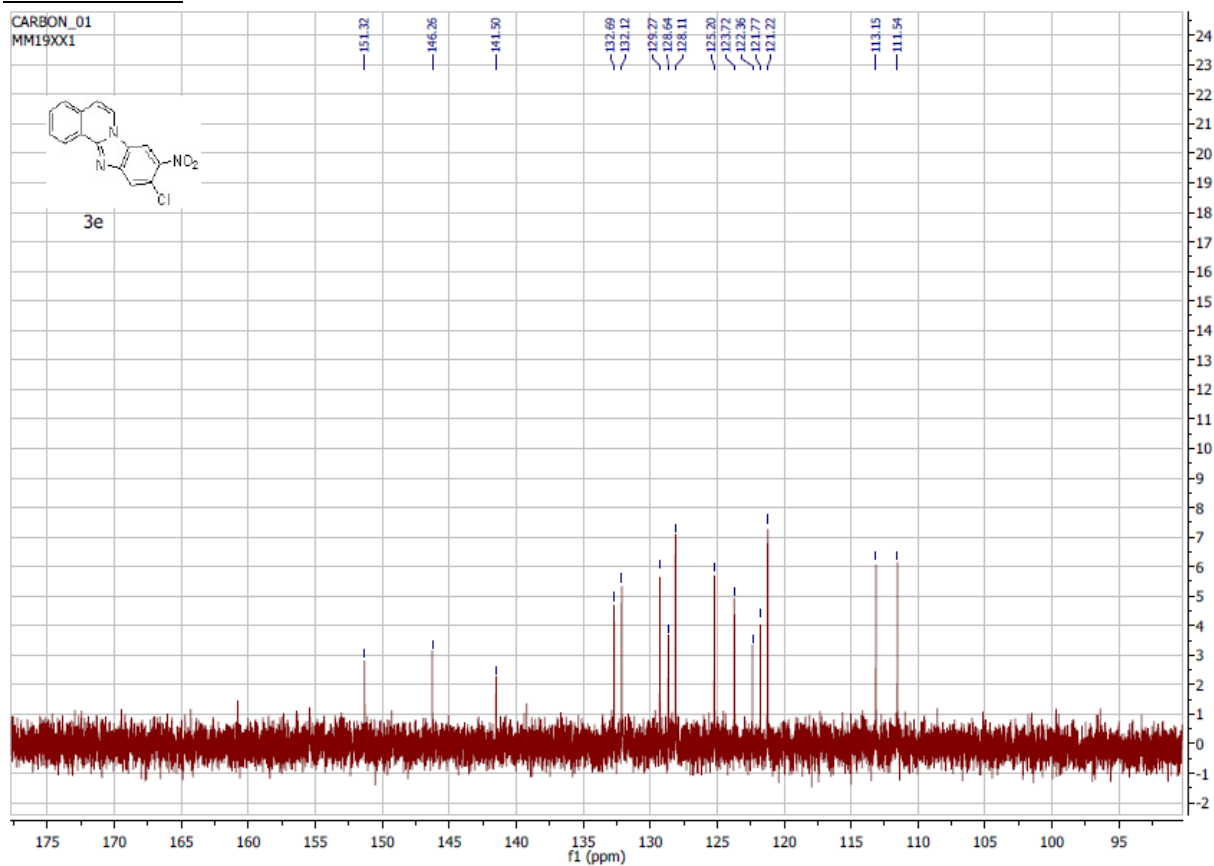

# <sup>1</sup>H NMR of **3f**

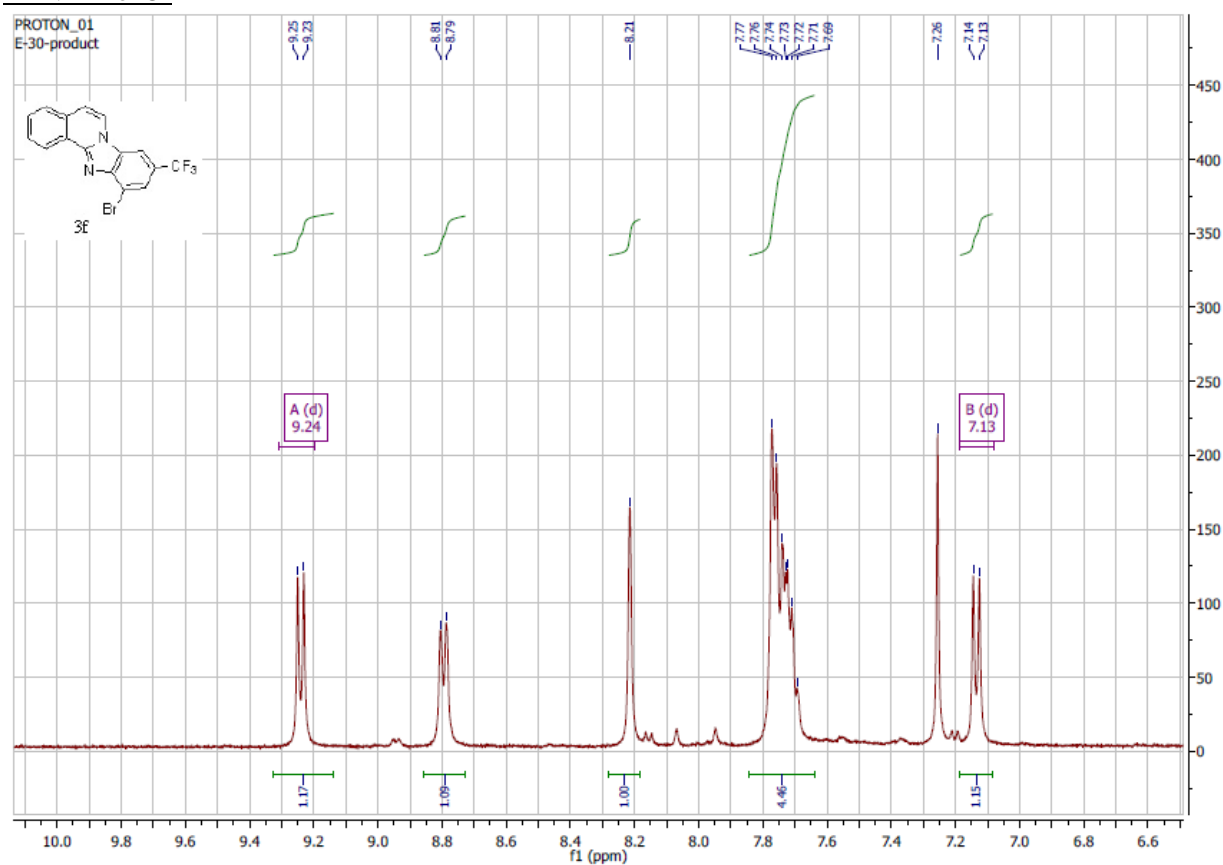

# <sup>13</sup>C NMR of **3f**

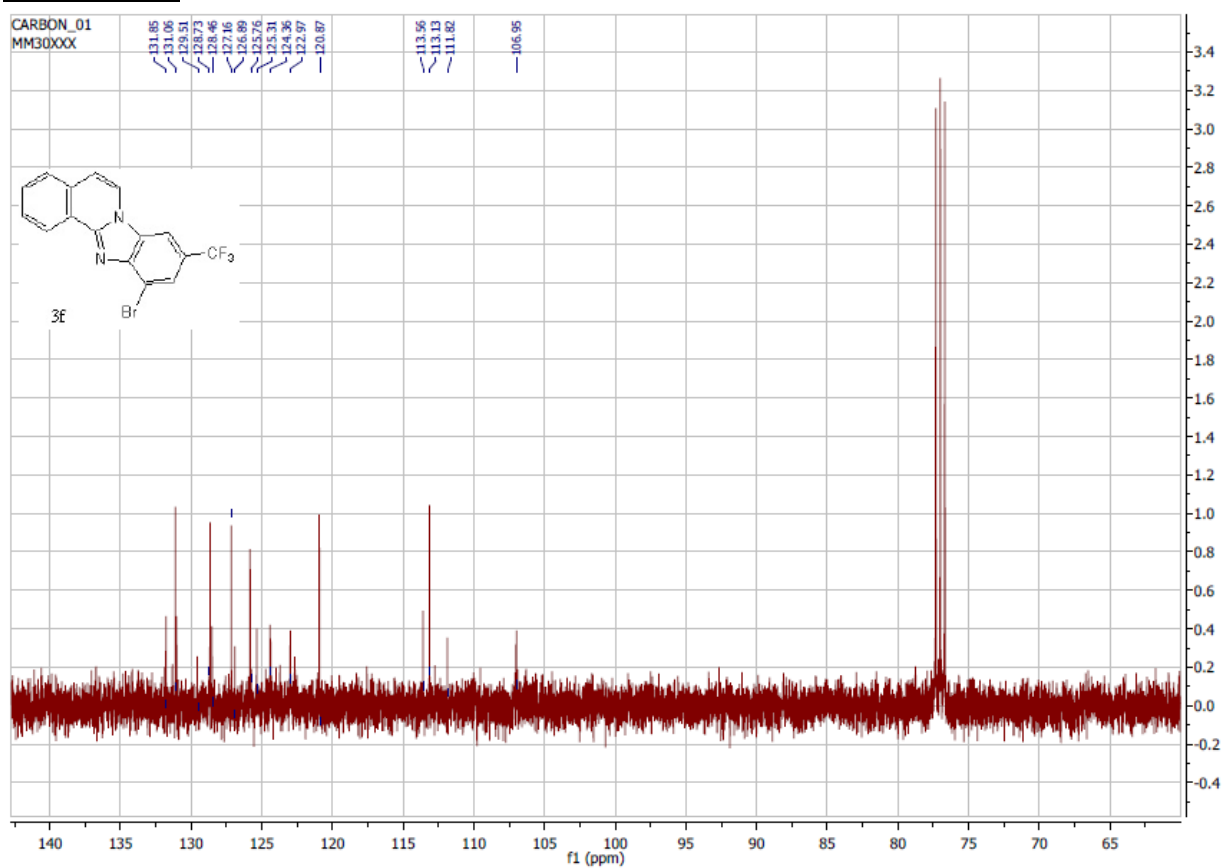

# <sup>1</sup>H NMR of **3g**

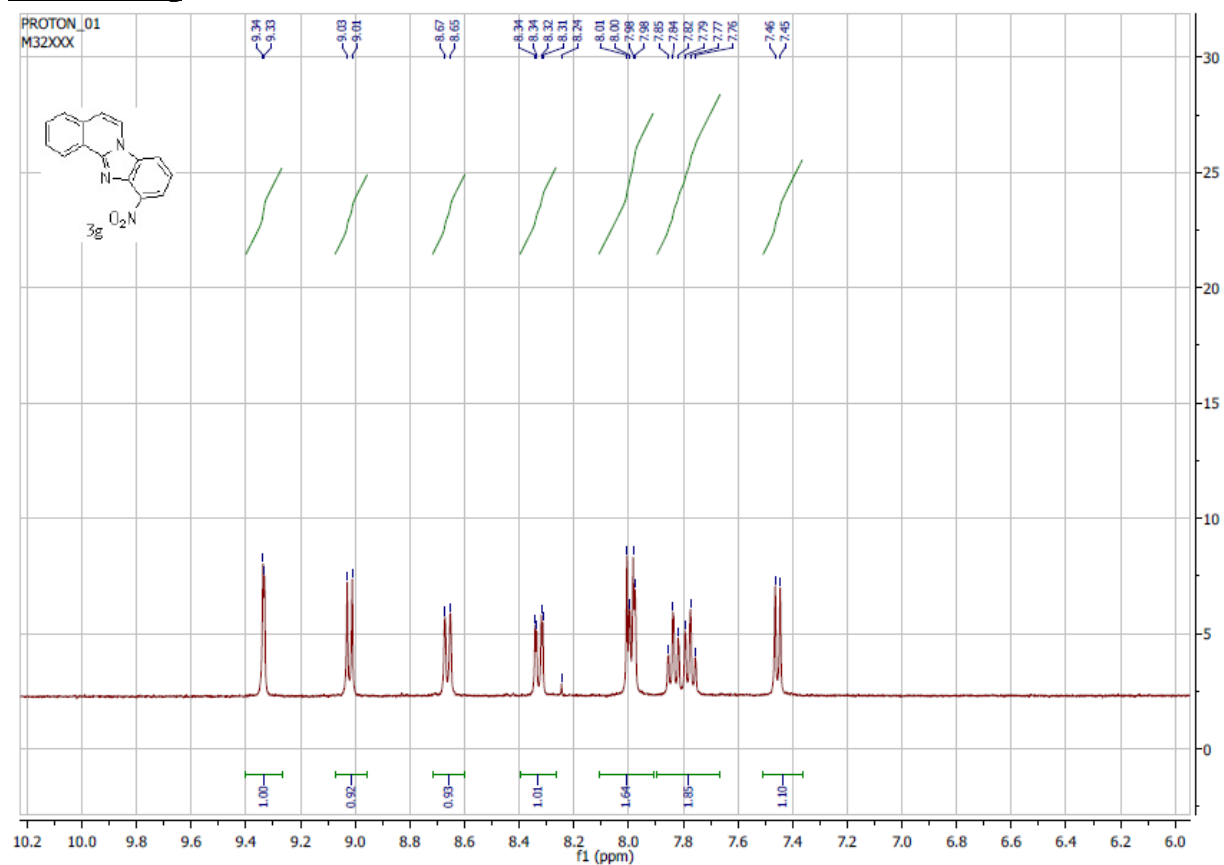

# <sup>13</sup>C NMR of **3g**

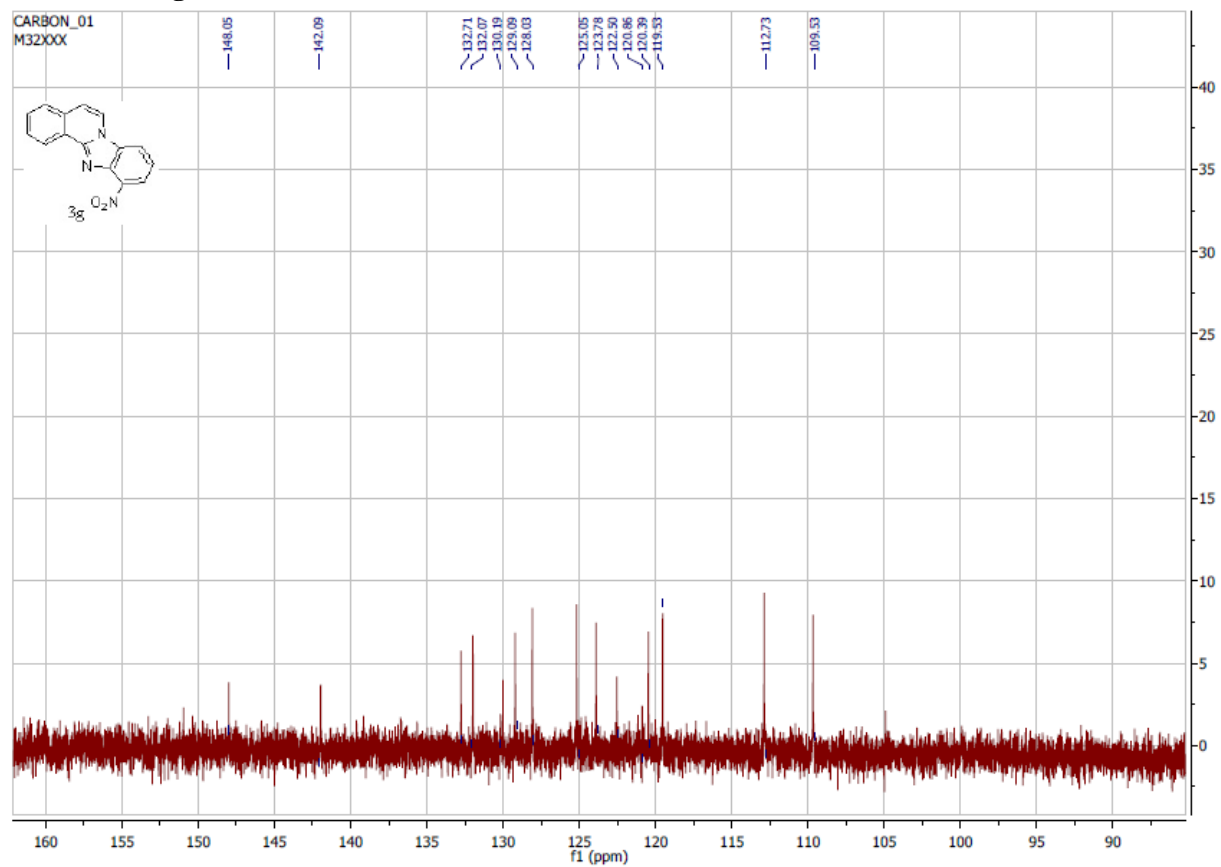



### <sup>1</sup>H NMR of **3h**

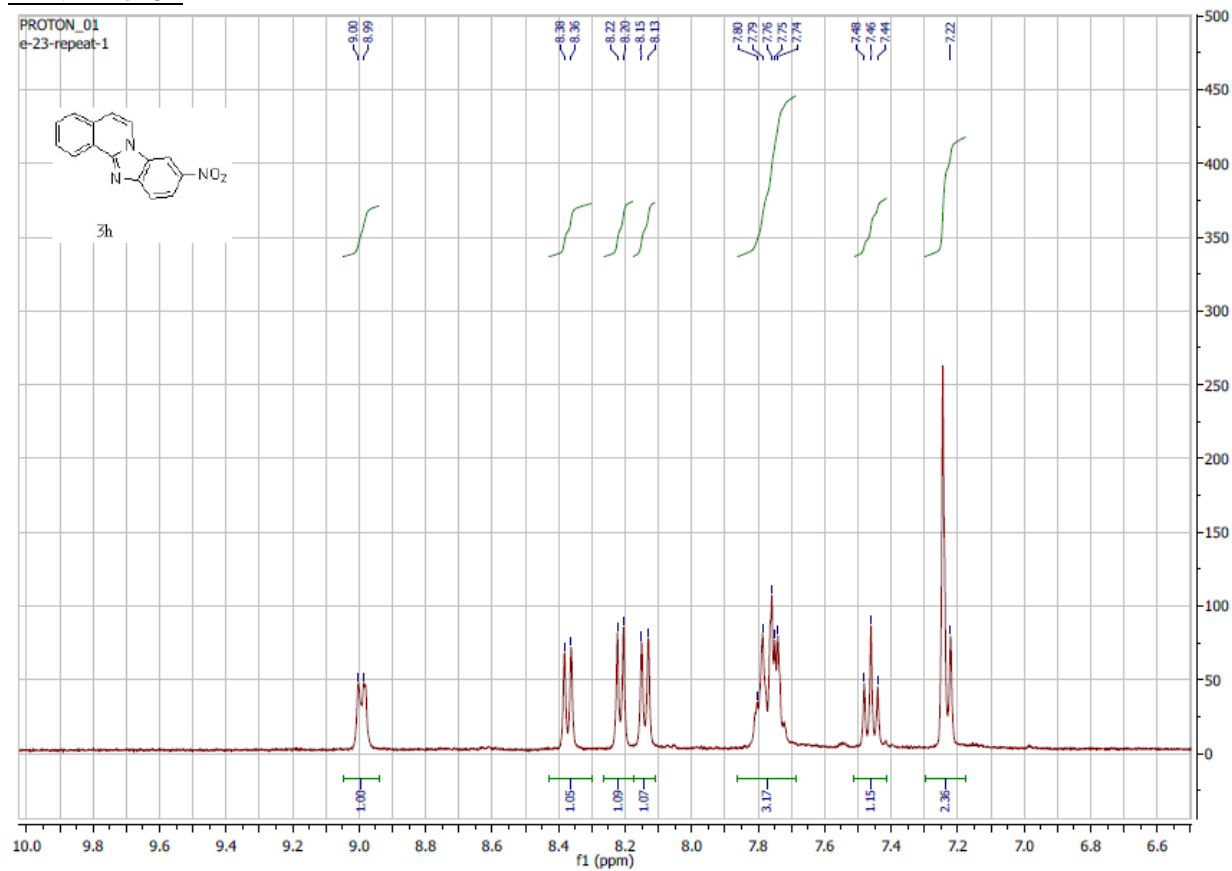

### <sup>13</sup>C NMR of **3h**

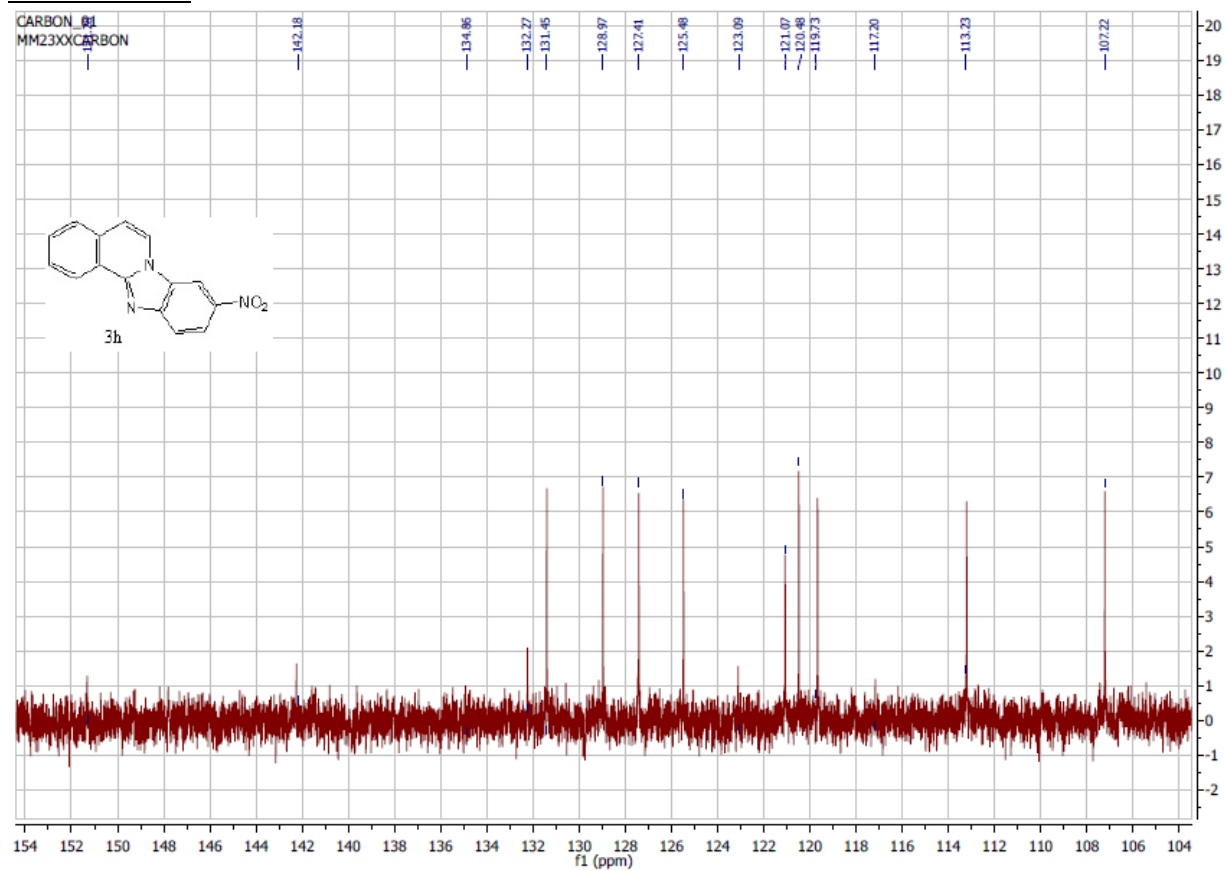

# <sup>1</sup>H NMR of **3i**

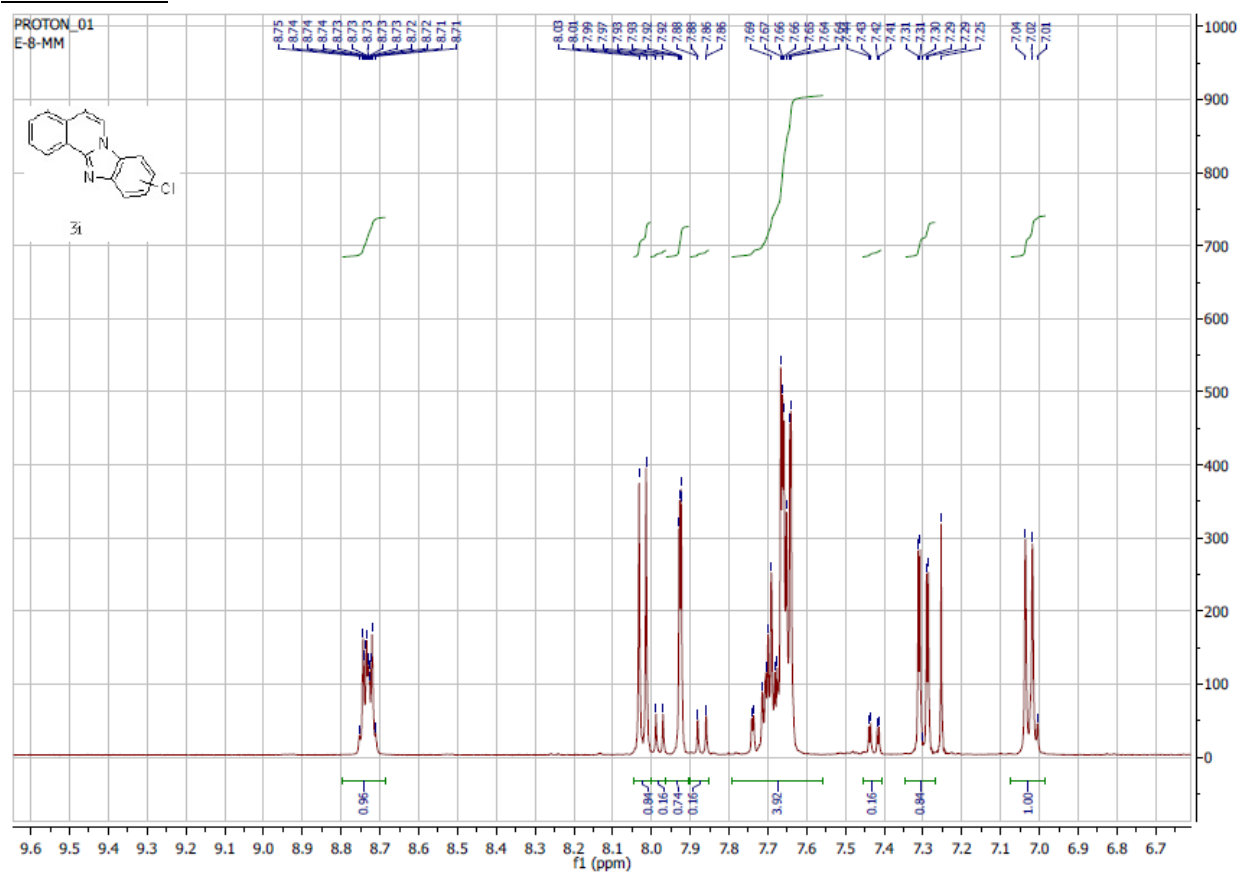

# <sup>13</sup>C NMR of **3i**

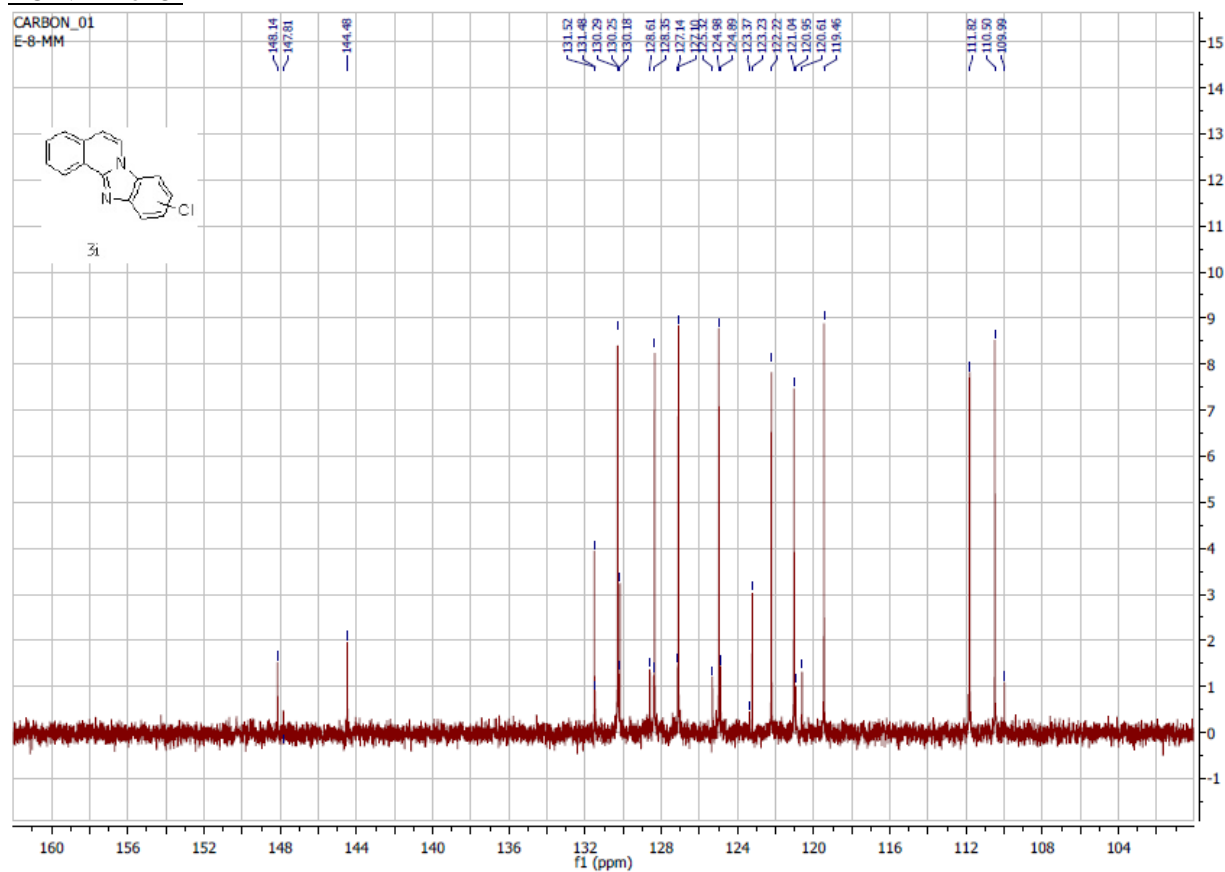

# <sup>1</sup>H NMR of 3j

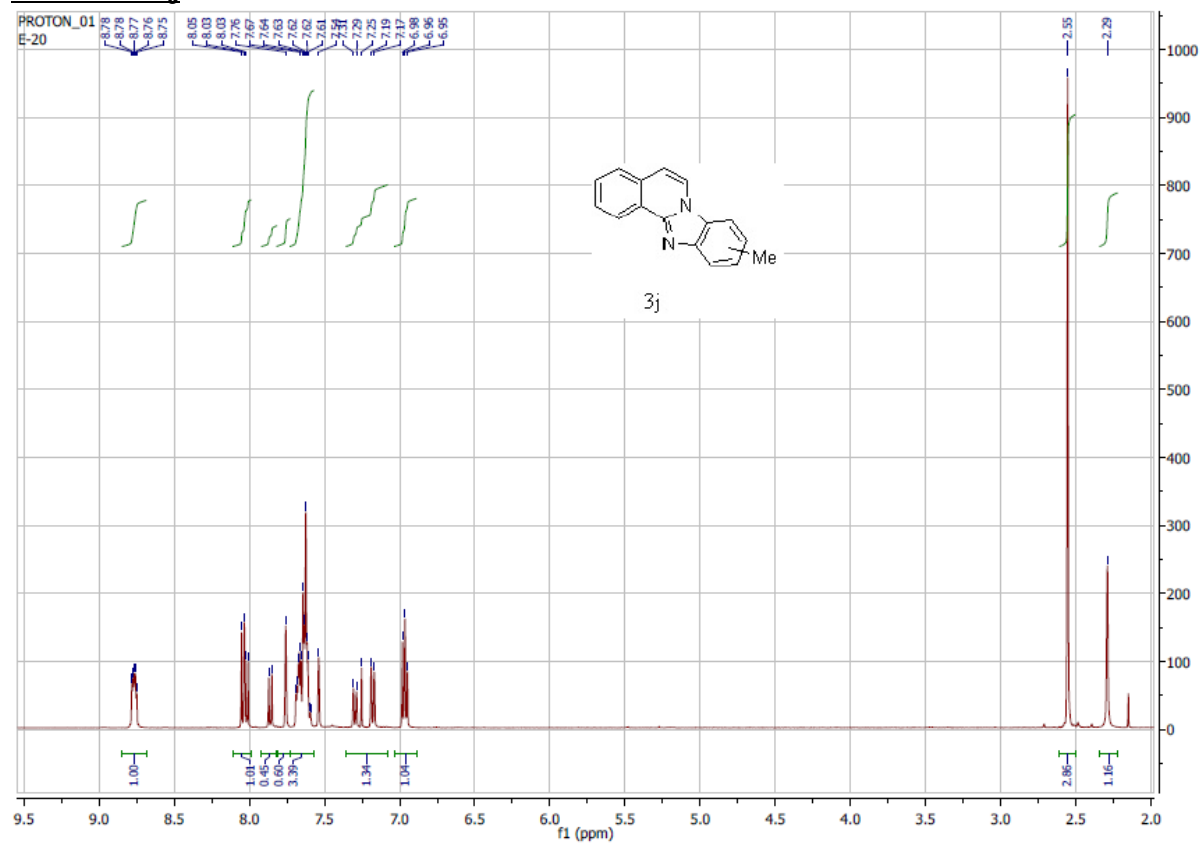

# <sup>13</sup>C NMR of 3j

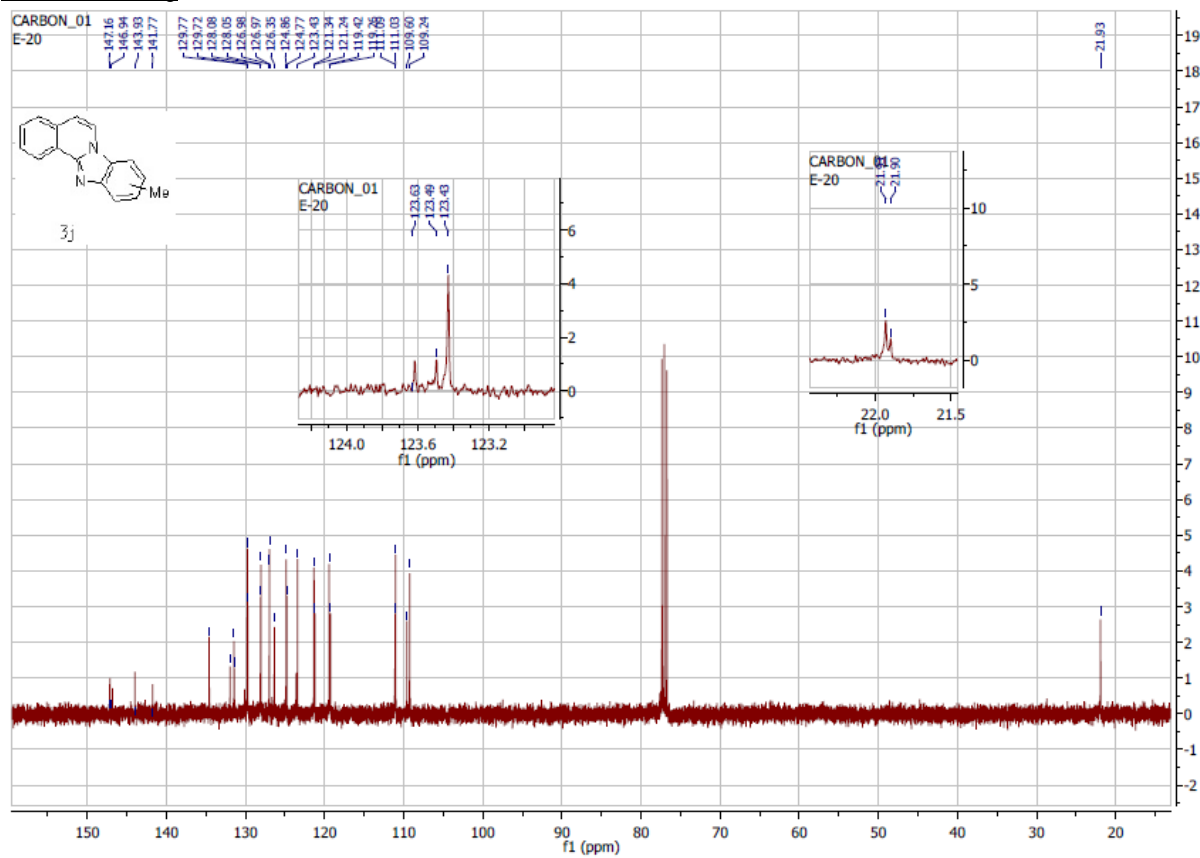

# <sup>1</sup>H NMR of **3k**

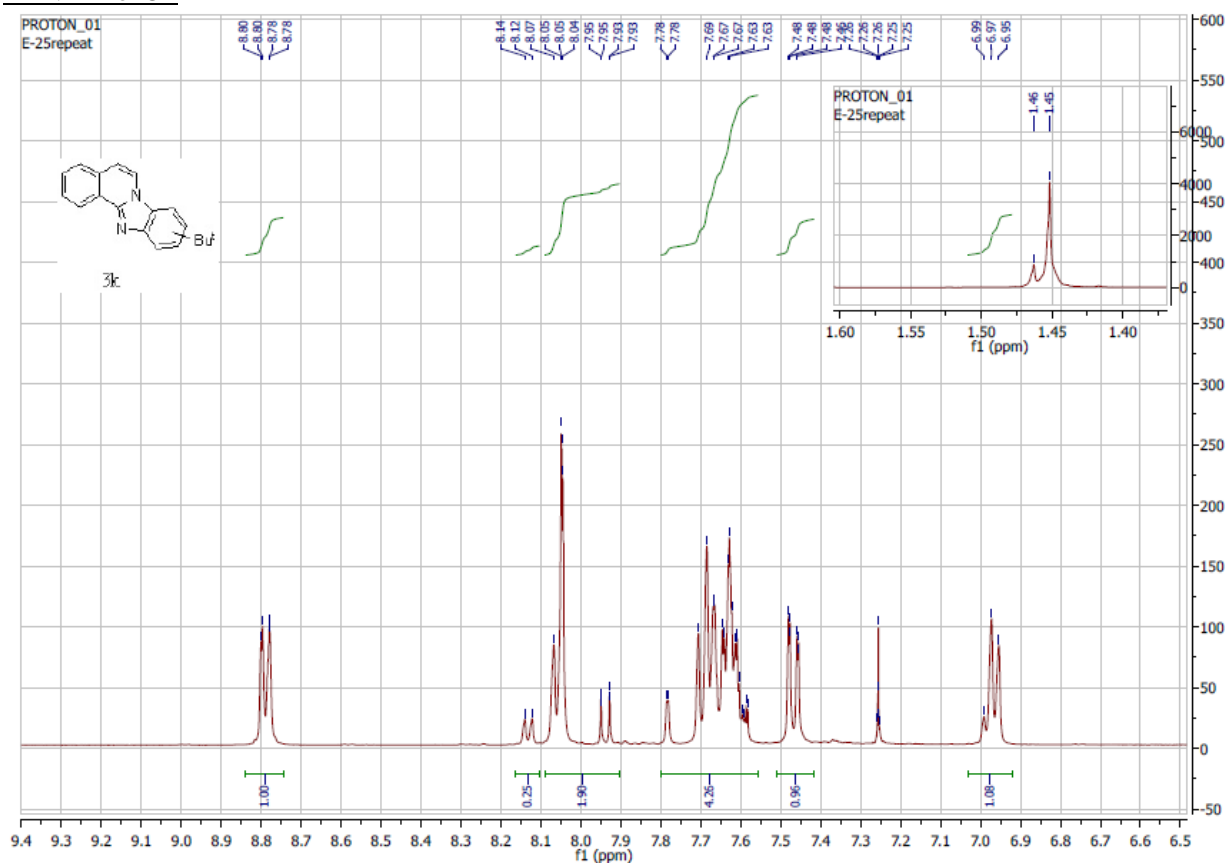

# <sup>13</sup>C NMR of **3k**

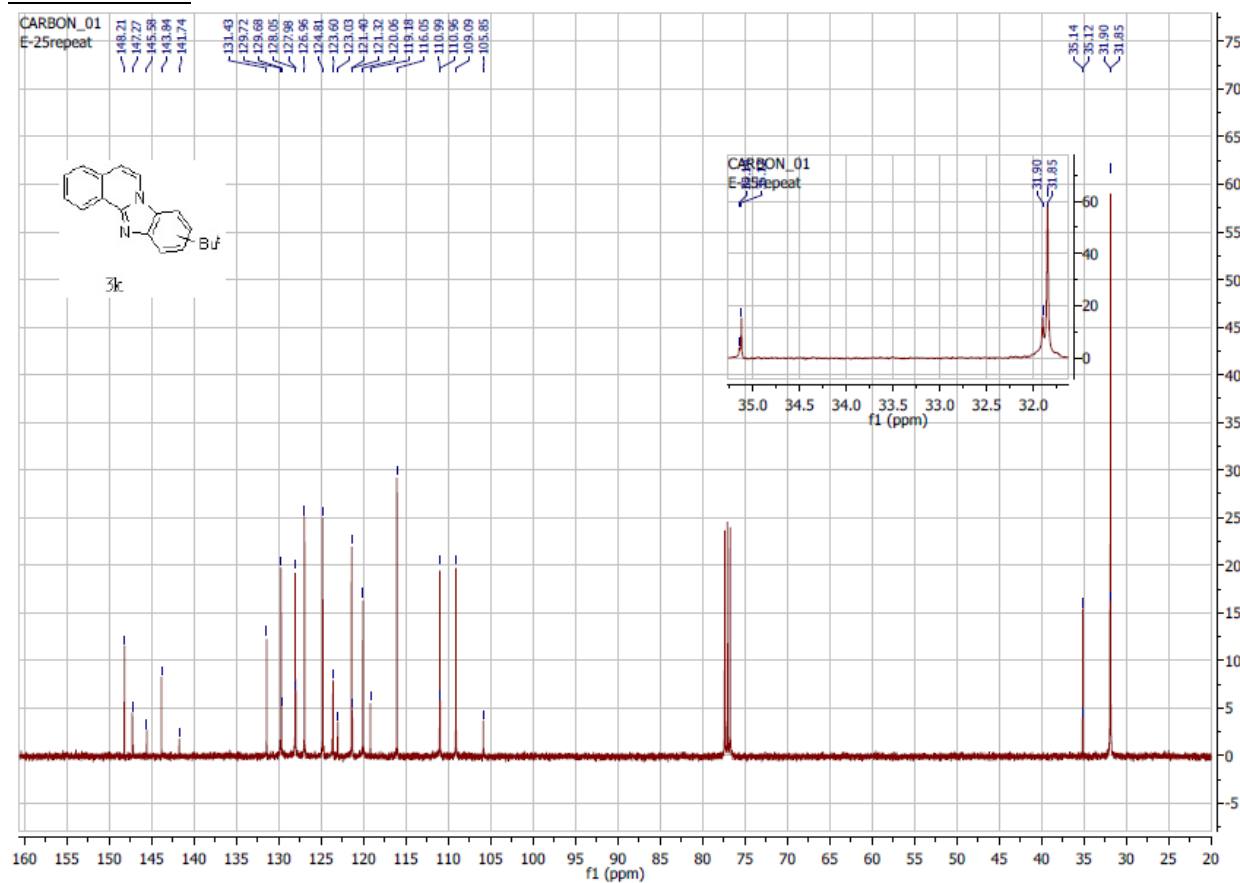

### <sup>1</sup>H NMR of 3l

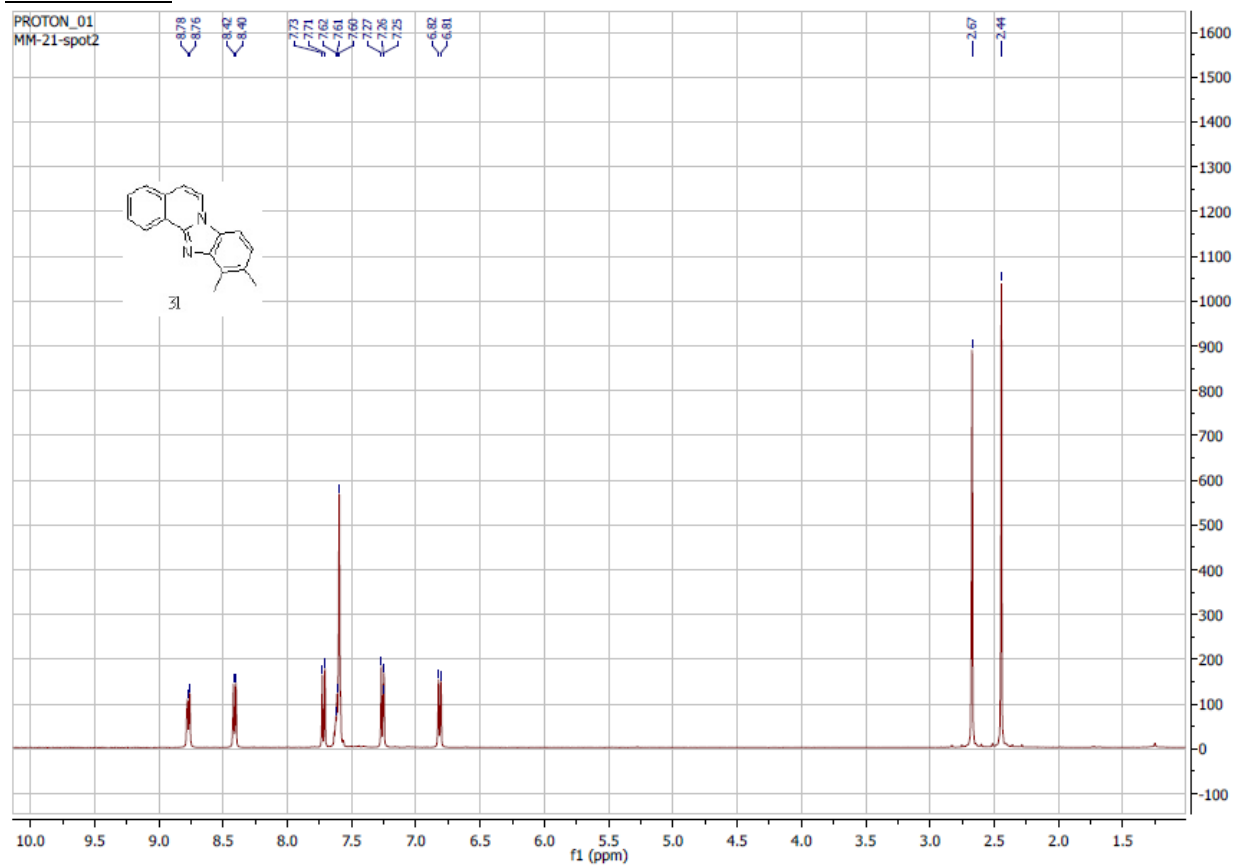

<sup>13</sup>C NMR of **3l**

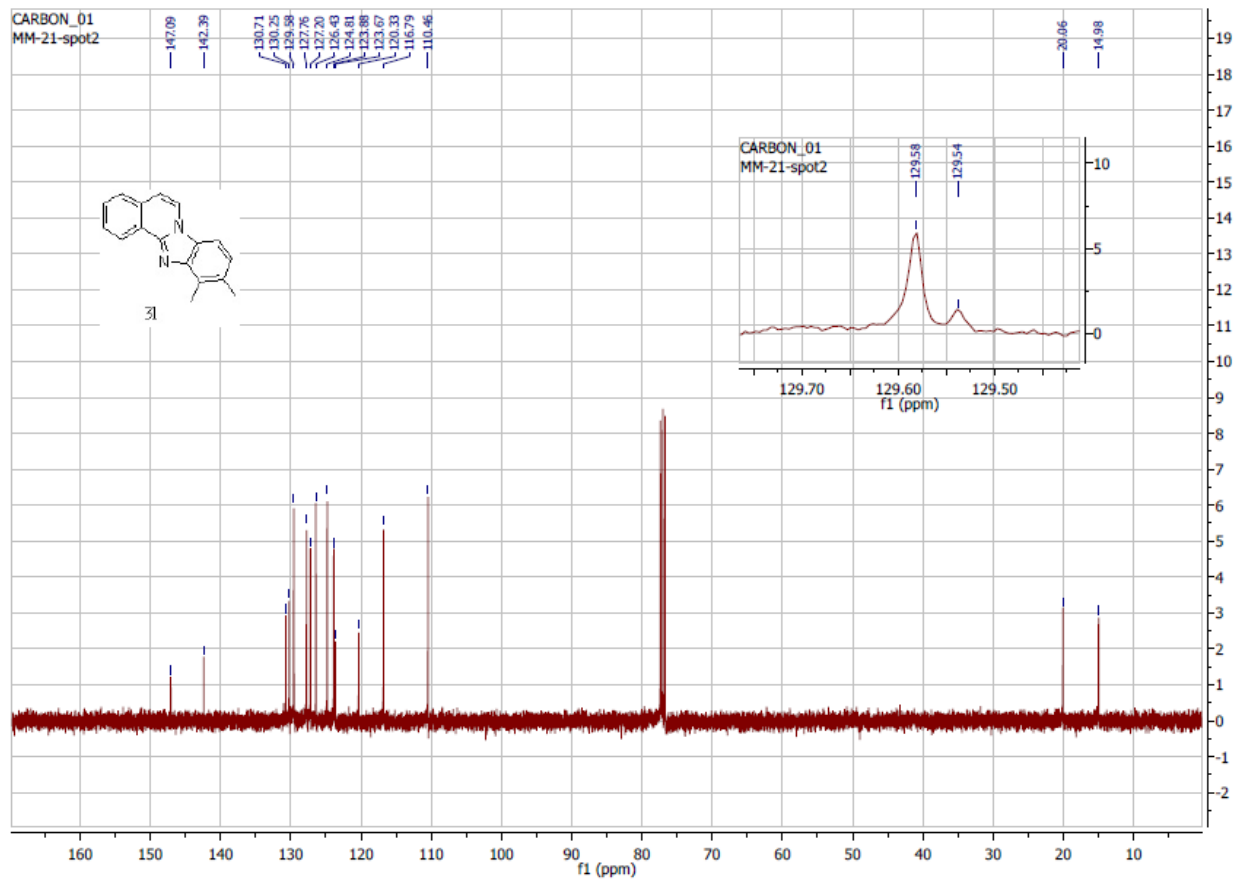

# <sup>1</sup>H NMR of 3m

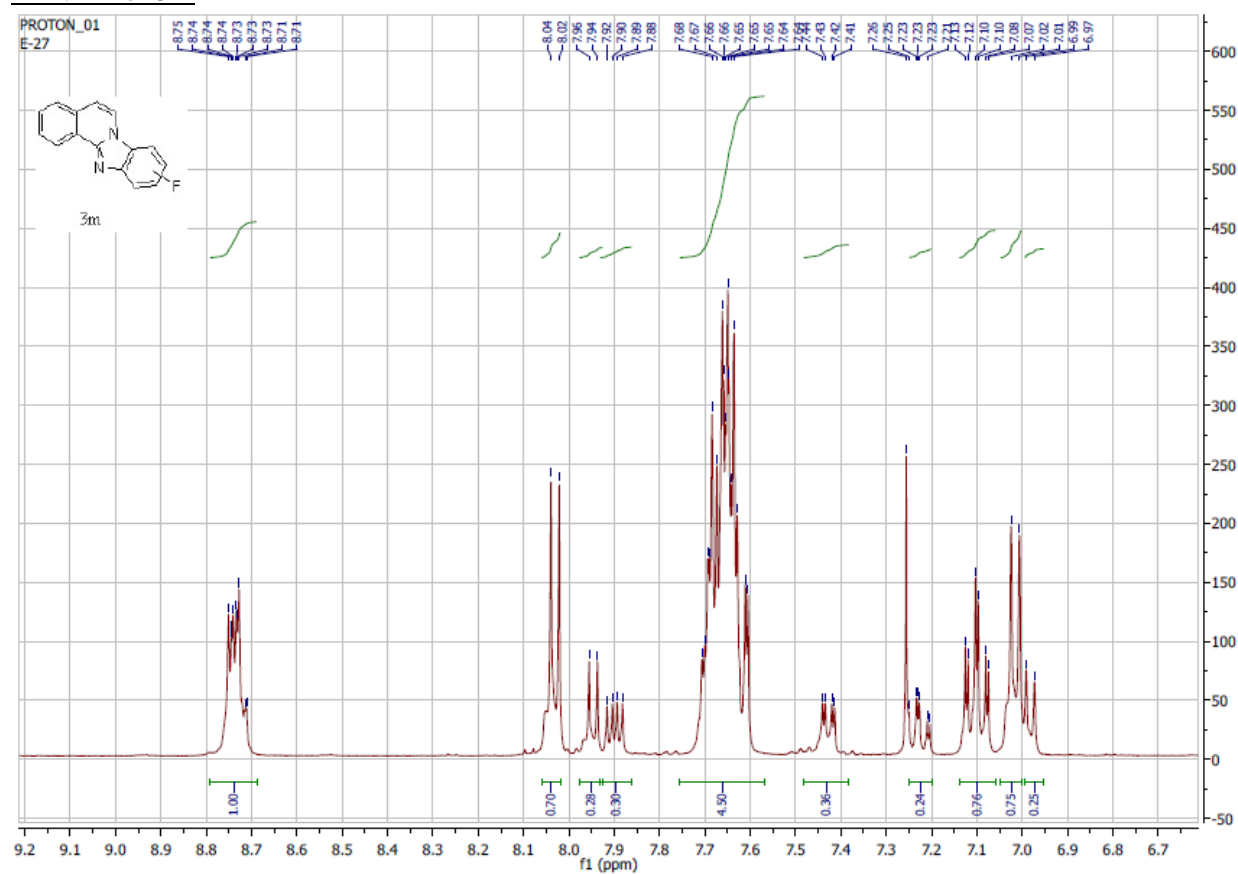

# <sup>13</sup>C NMR of 3m

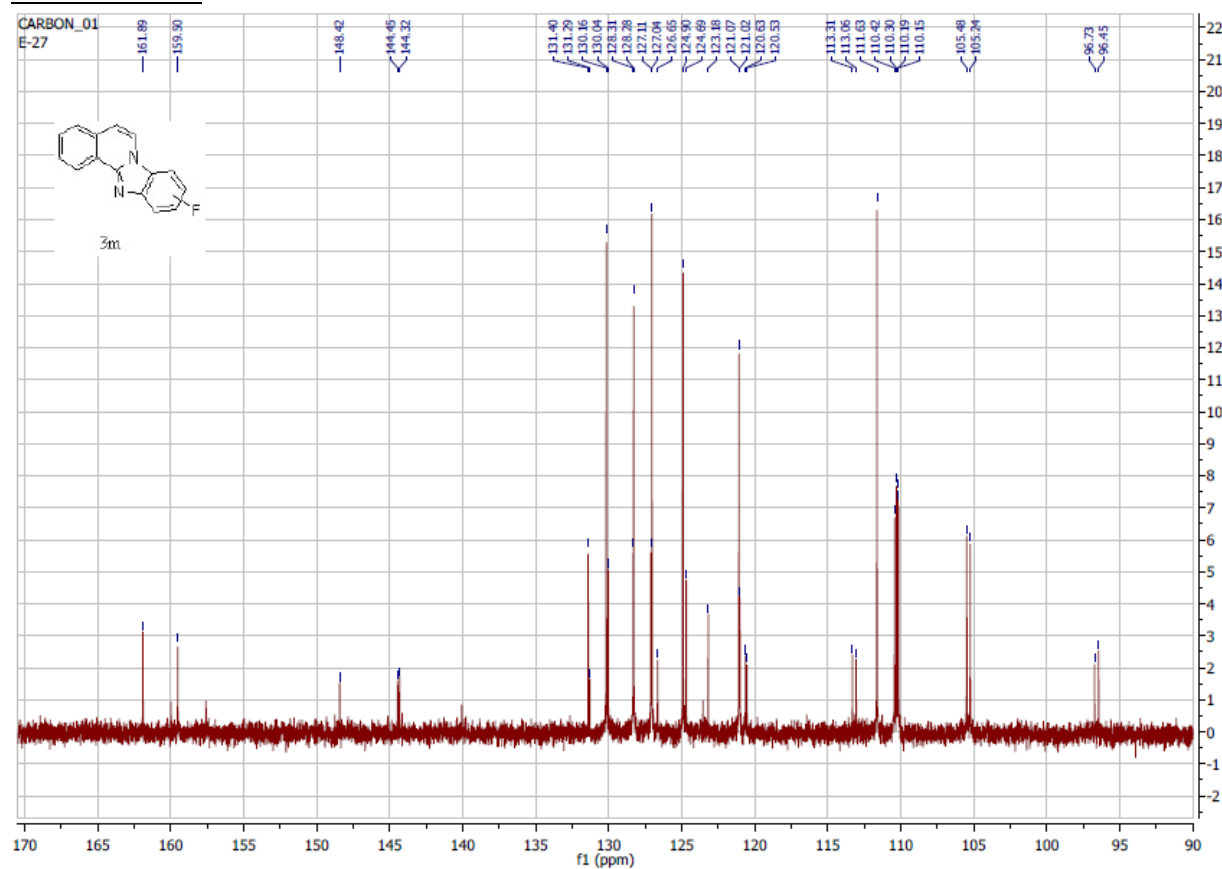

### <sup>1</sup>H NMR of **3n**

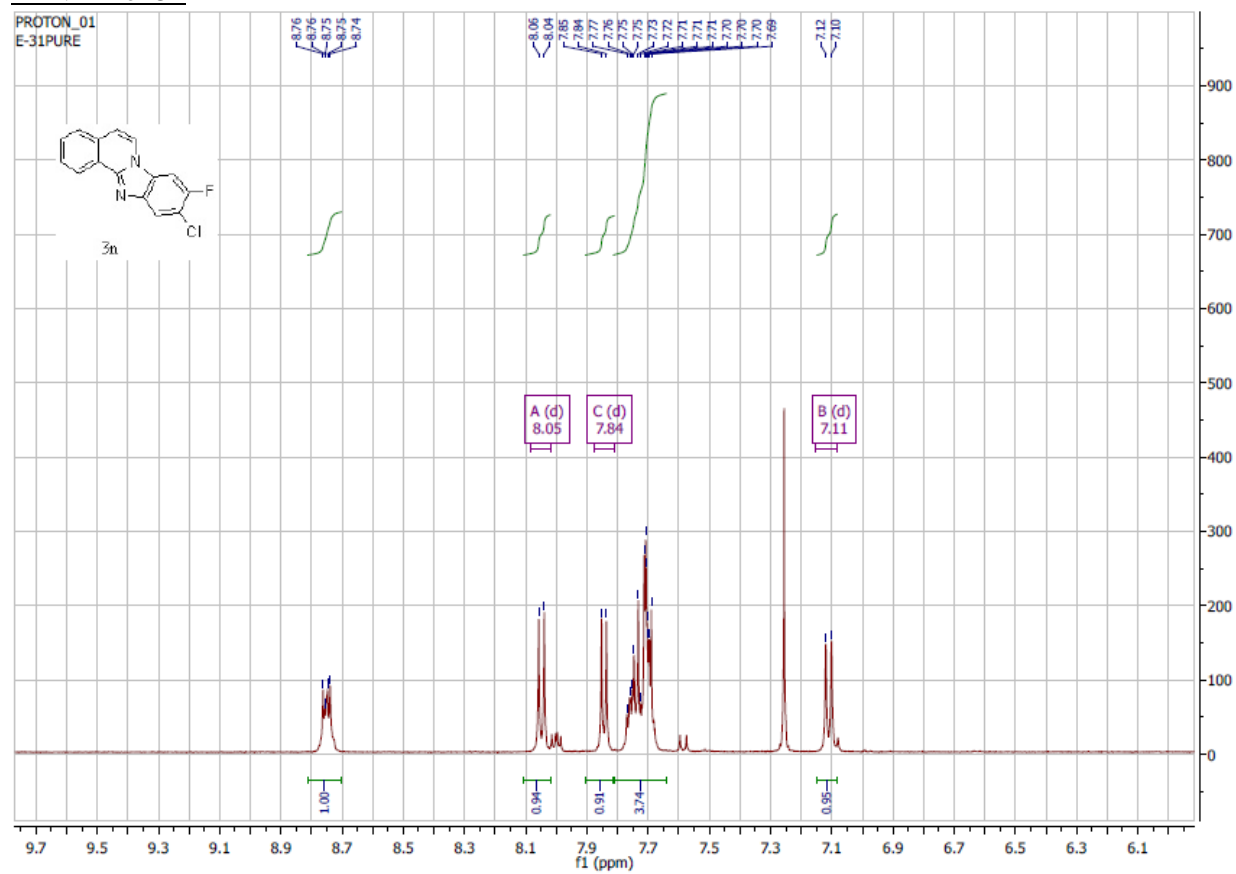

### <sup>13</sup>C NMR of **3n**

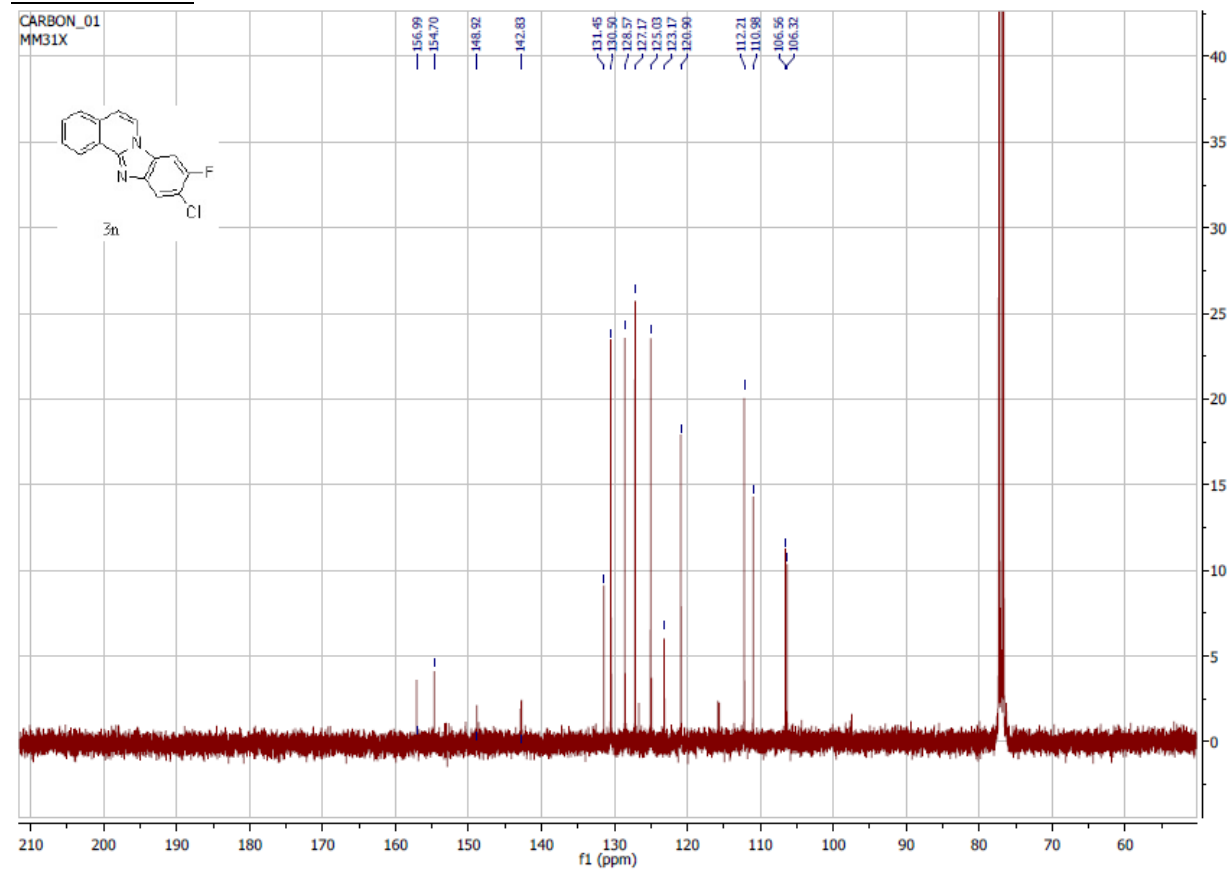

# <sup>1</sup>H NMR of 4d

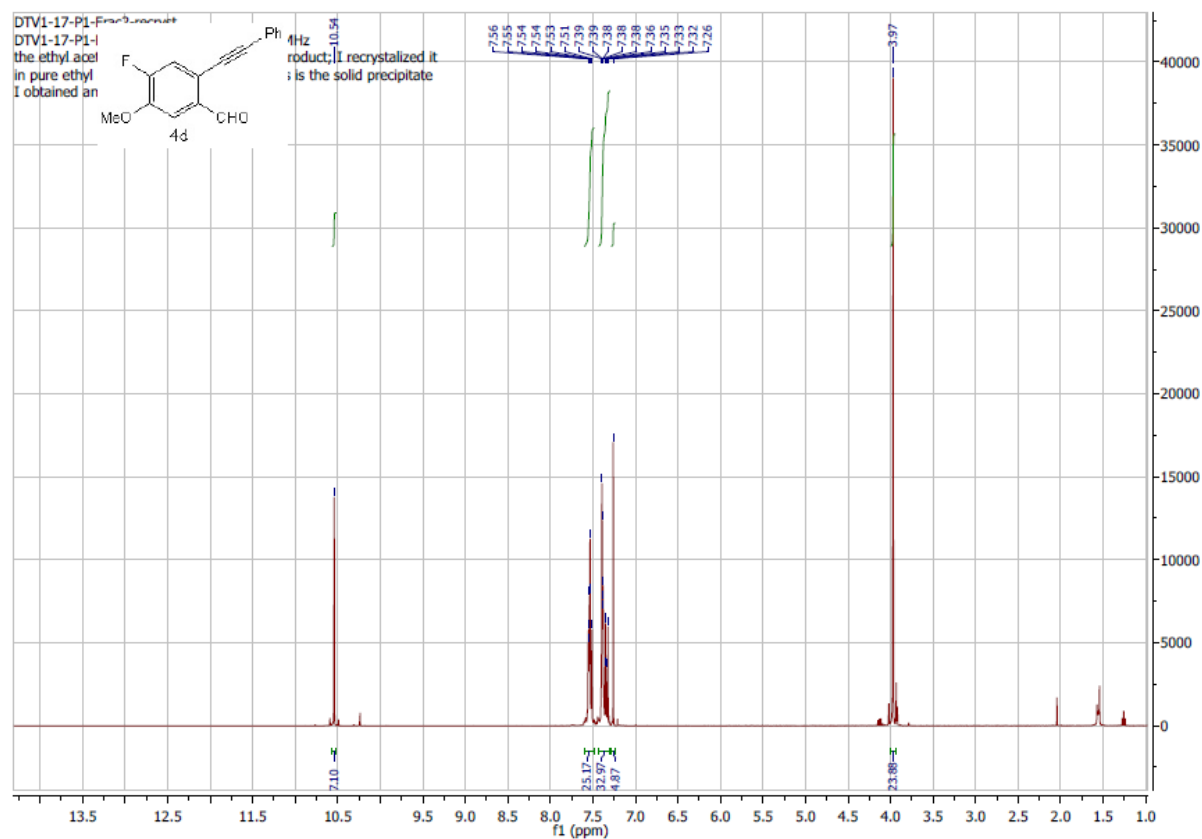

# <sup>13</sup>C NMR of 4d

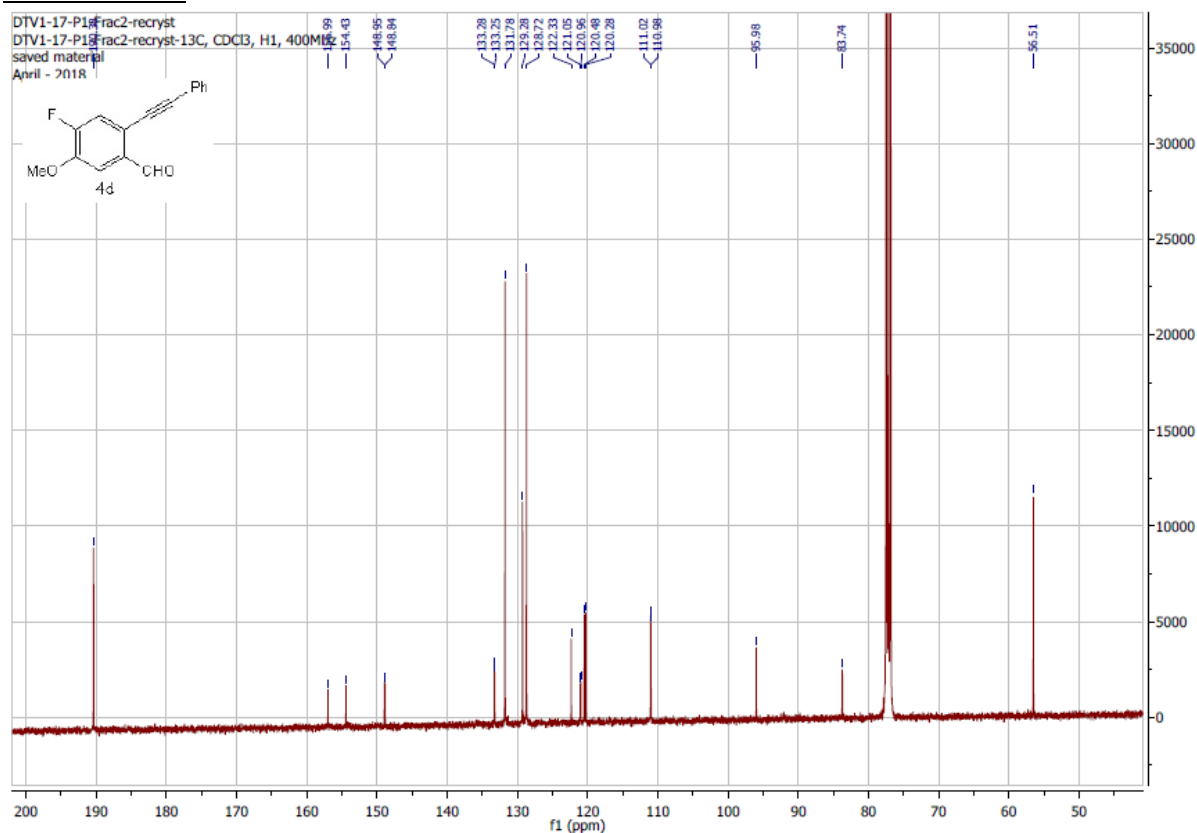



<sup>1</sup>H NMR of **5a**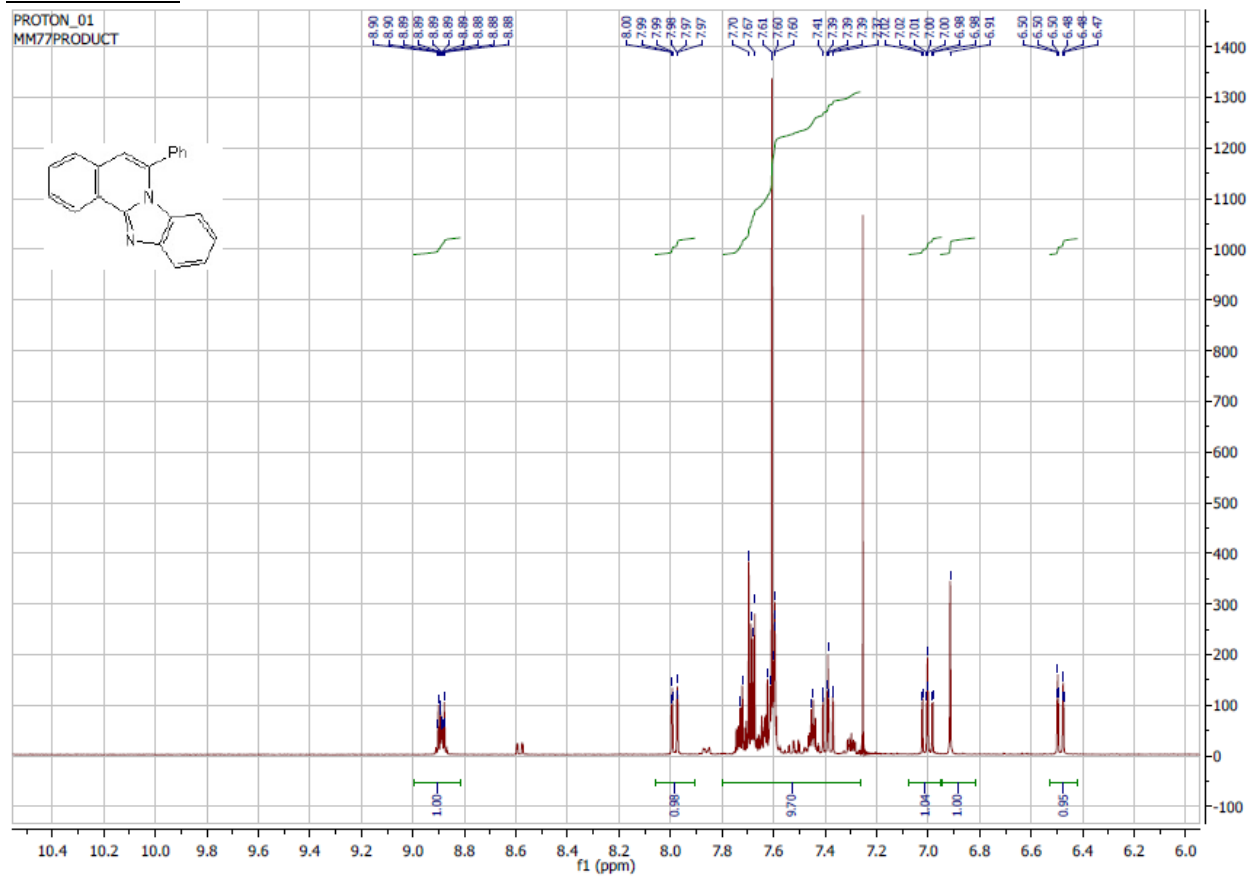 $^{13}\text{C}$  NMR of **5a**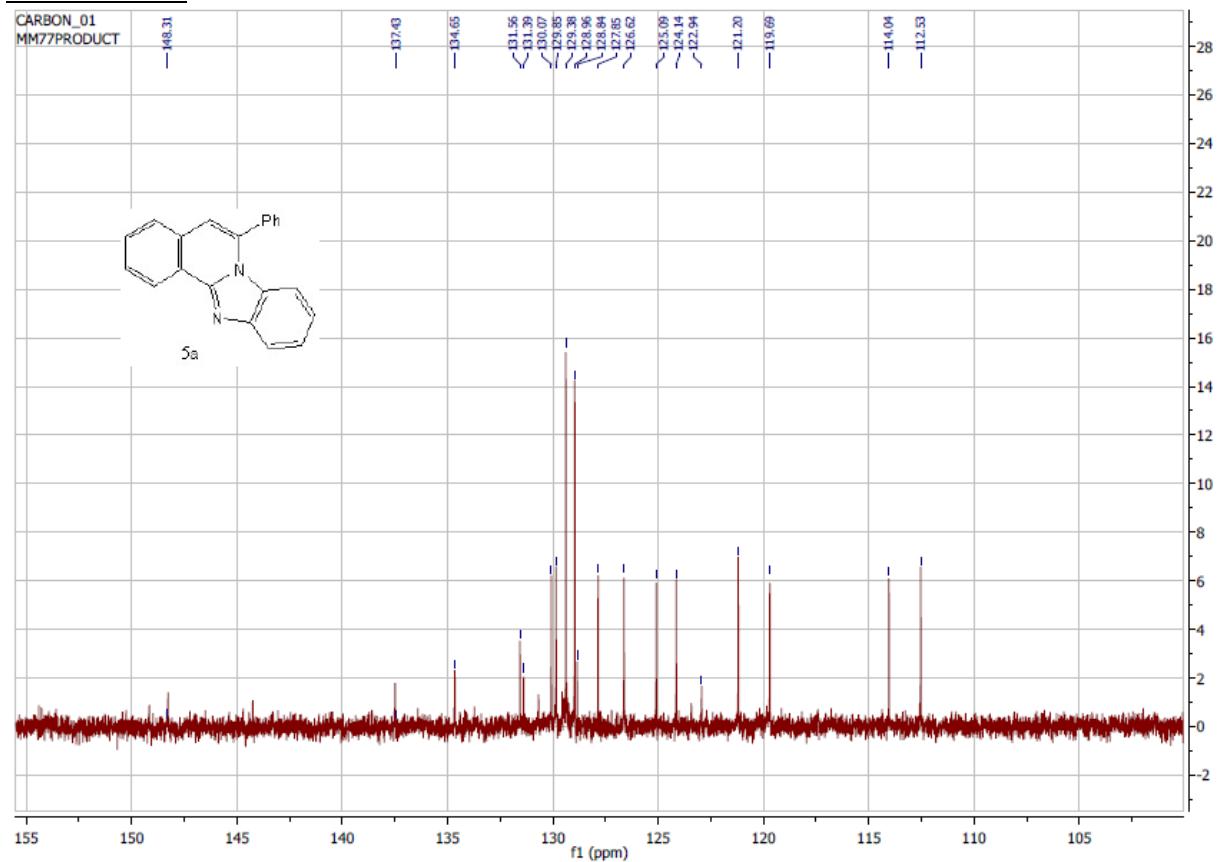

### <sup>1</sup>H NMR of **5b**

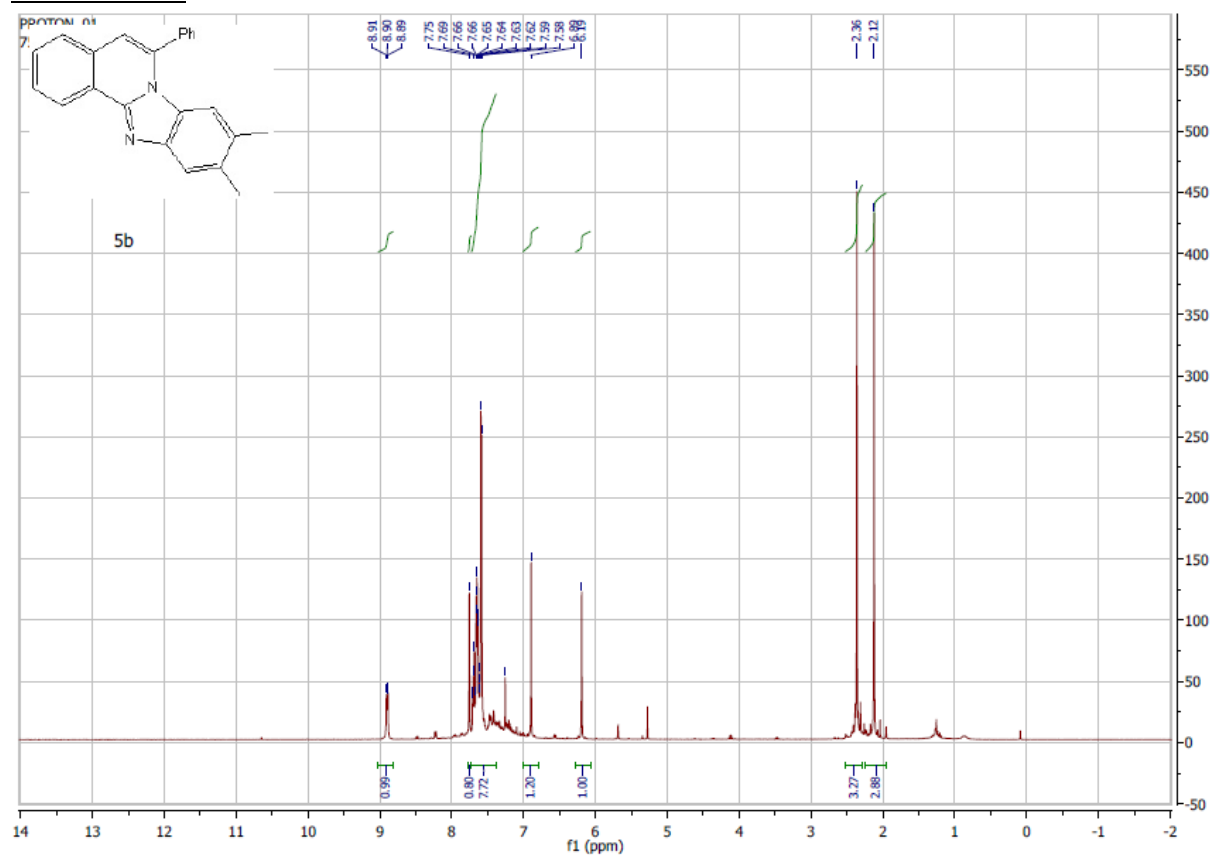

### <sup>13</sup>C NMR of **5b**

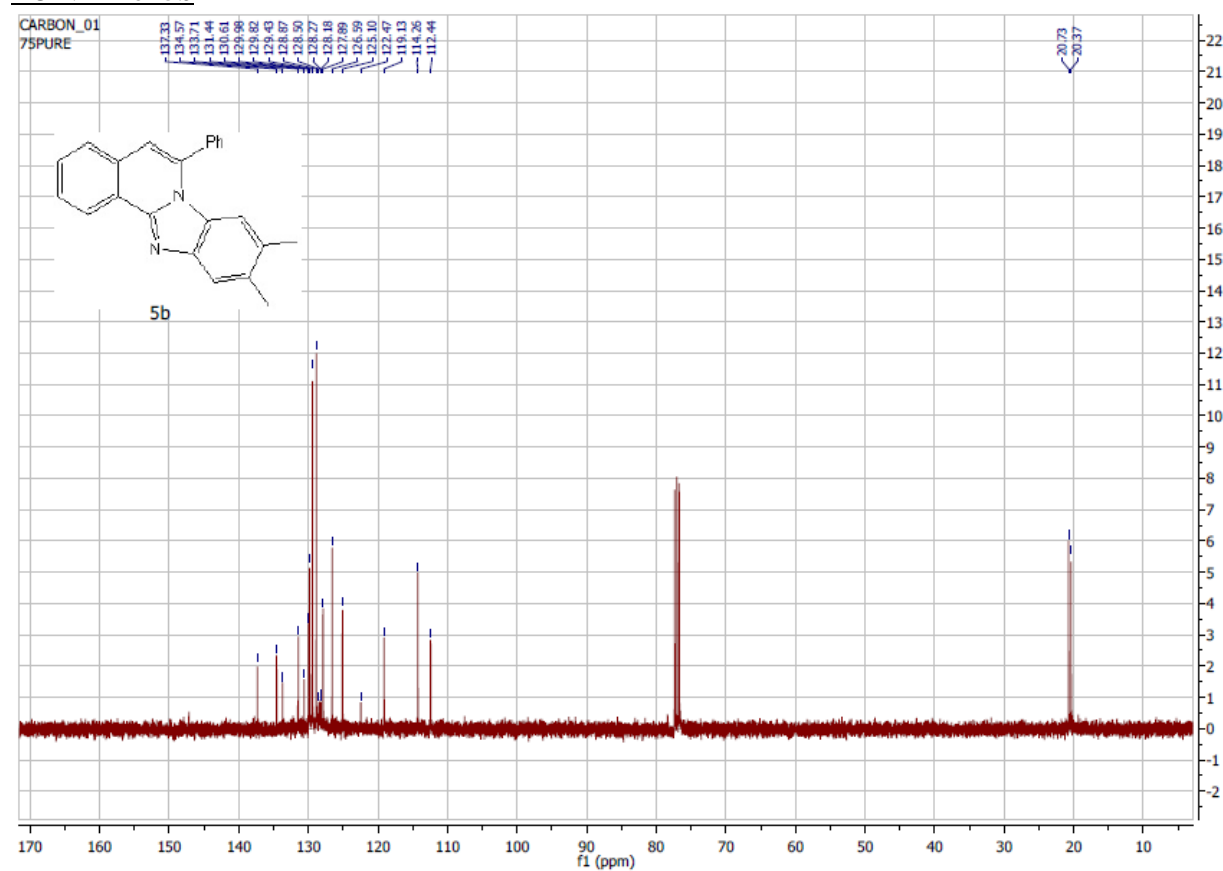

### <sup>1</sup>H NMR of **5c**

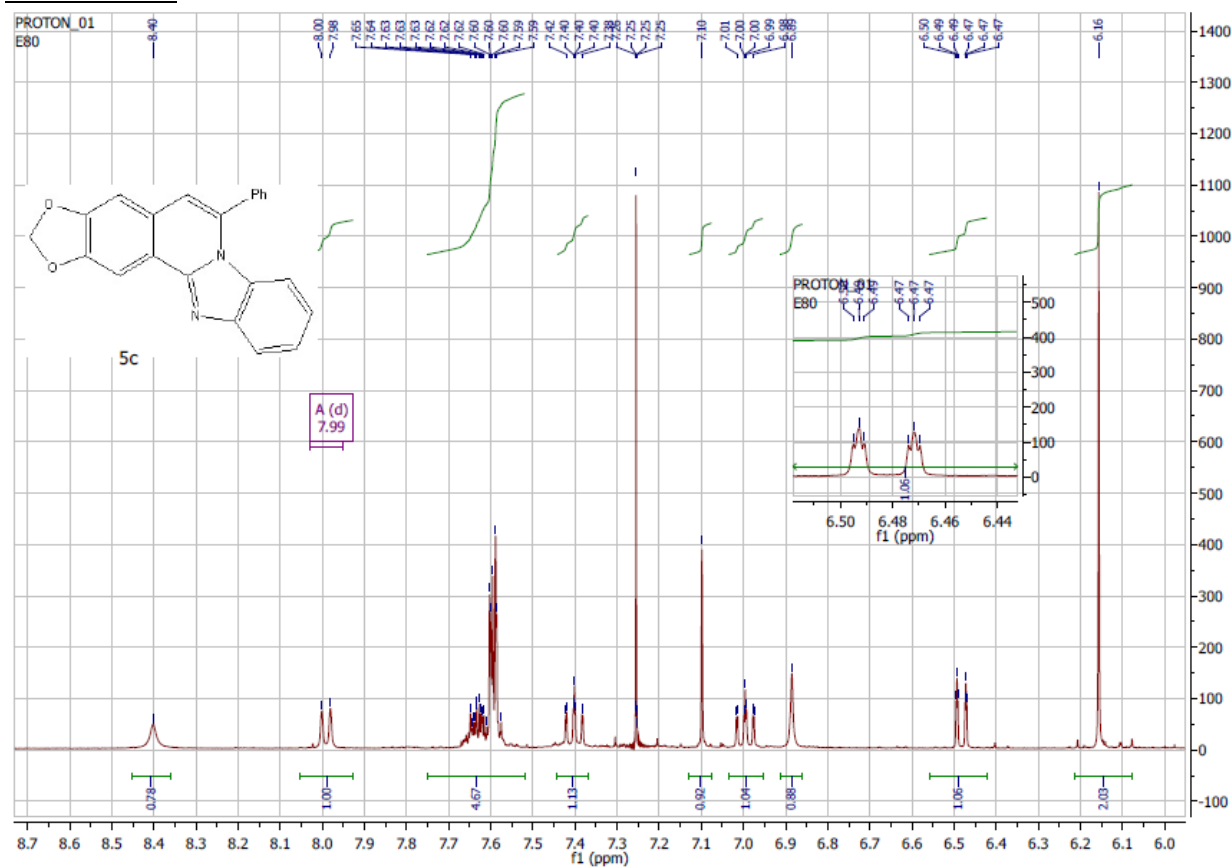

### <sup>13</sup>C NMR of **5c**

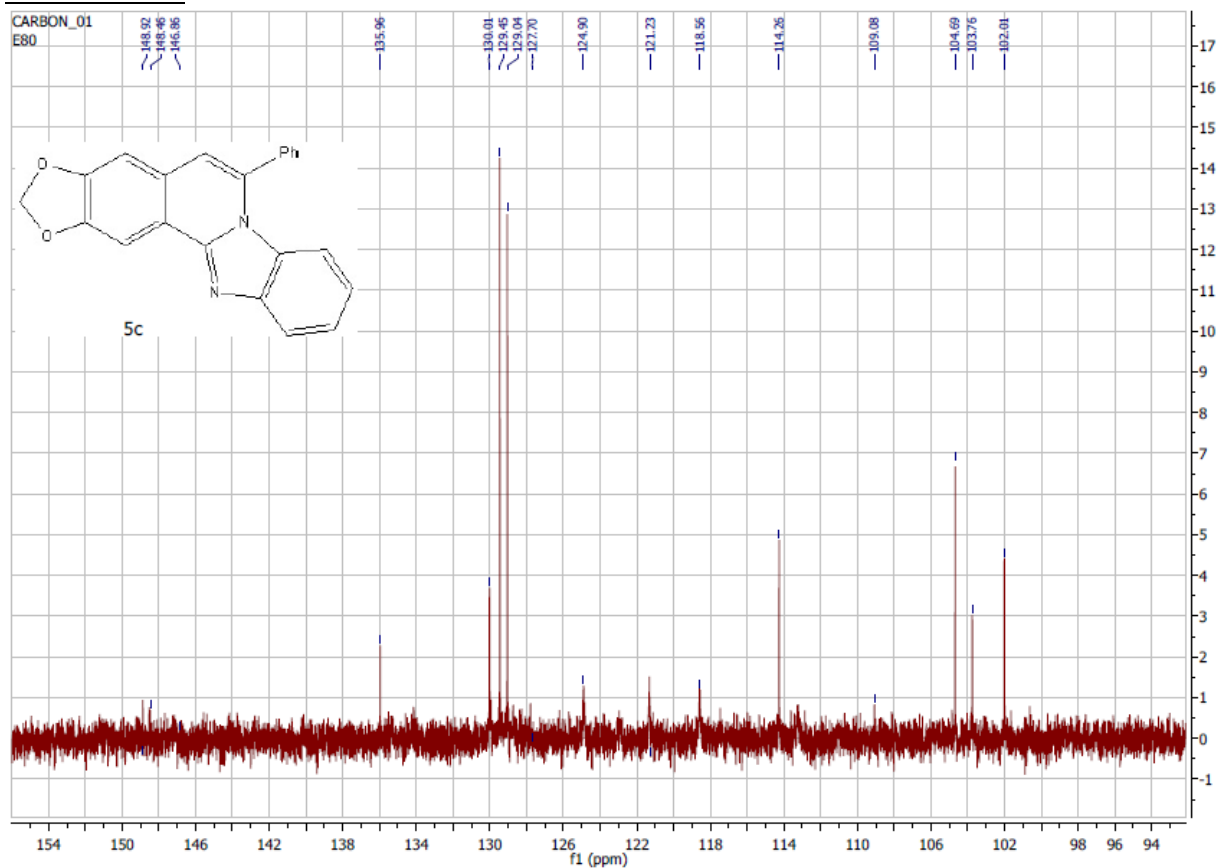

# <sup>1</sup>H NMR of **5d**

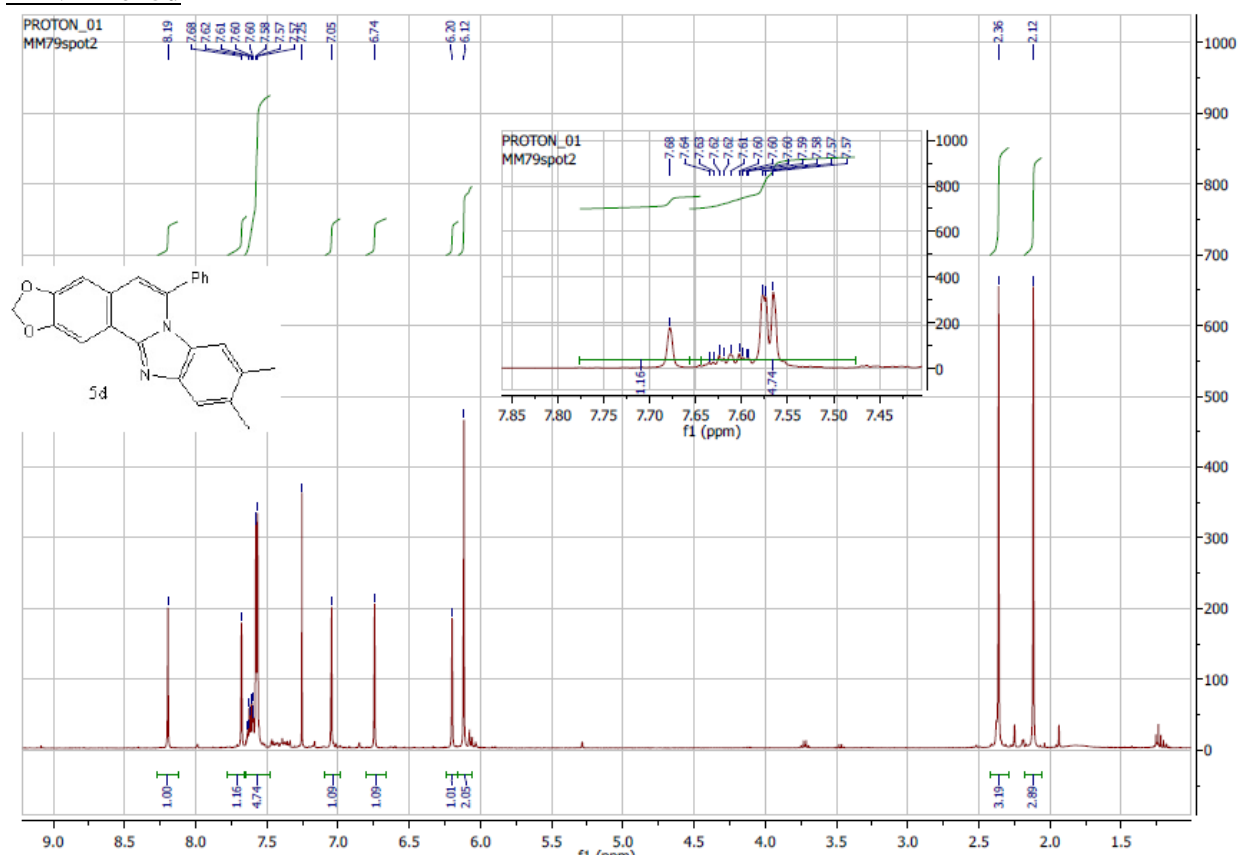

# <sup>13</sup>C NMR of **5d**

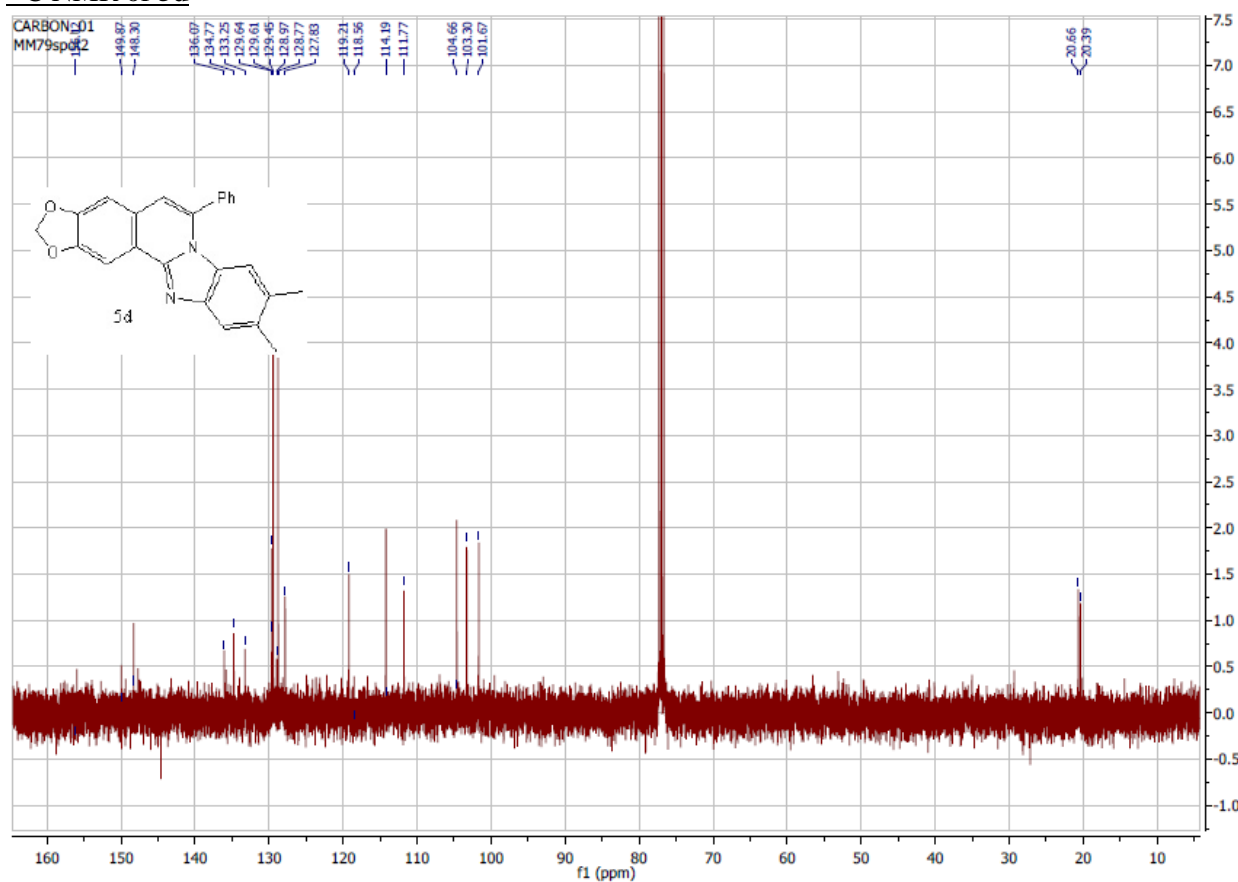

# <sup>1</sup>H NMR of 5e

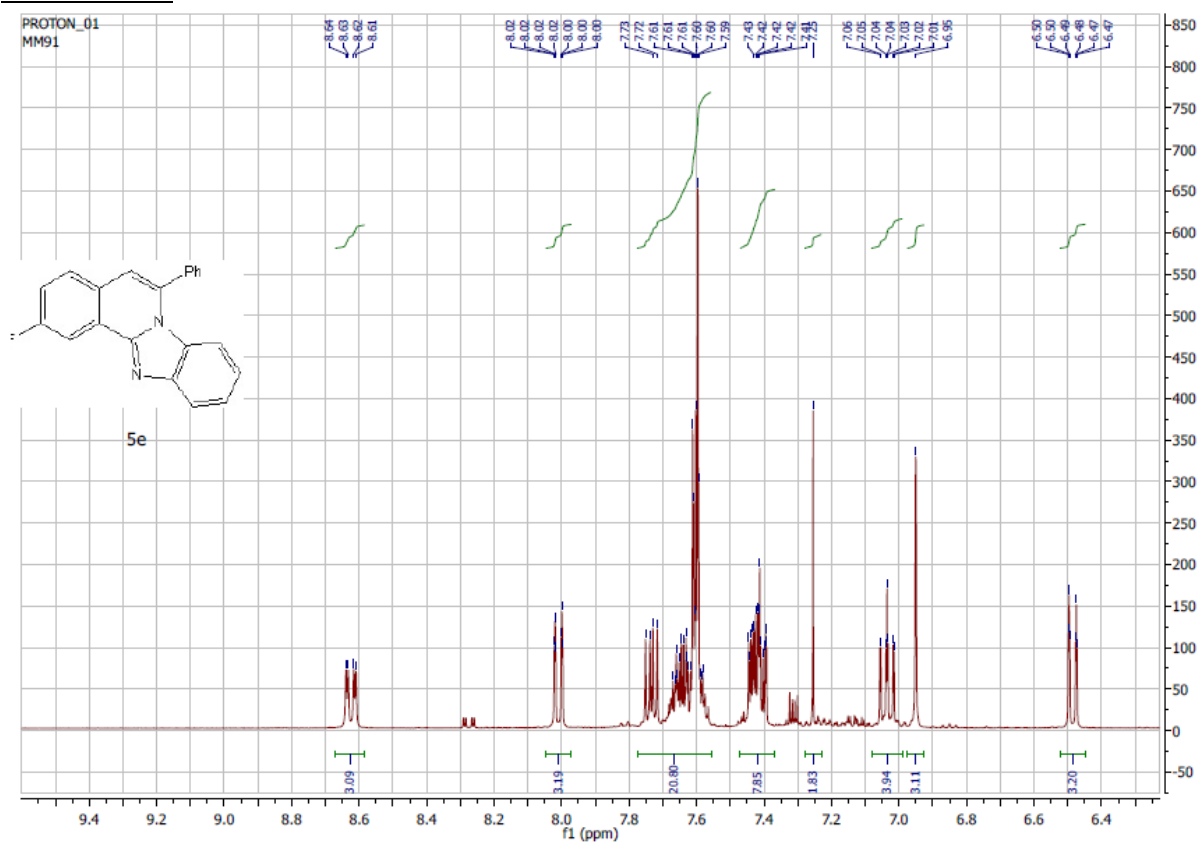

# <sup>13</sup>C NMR of 5e

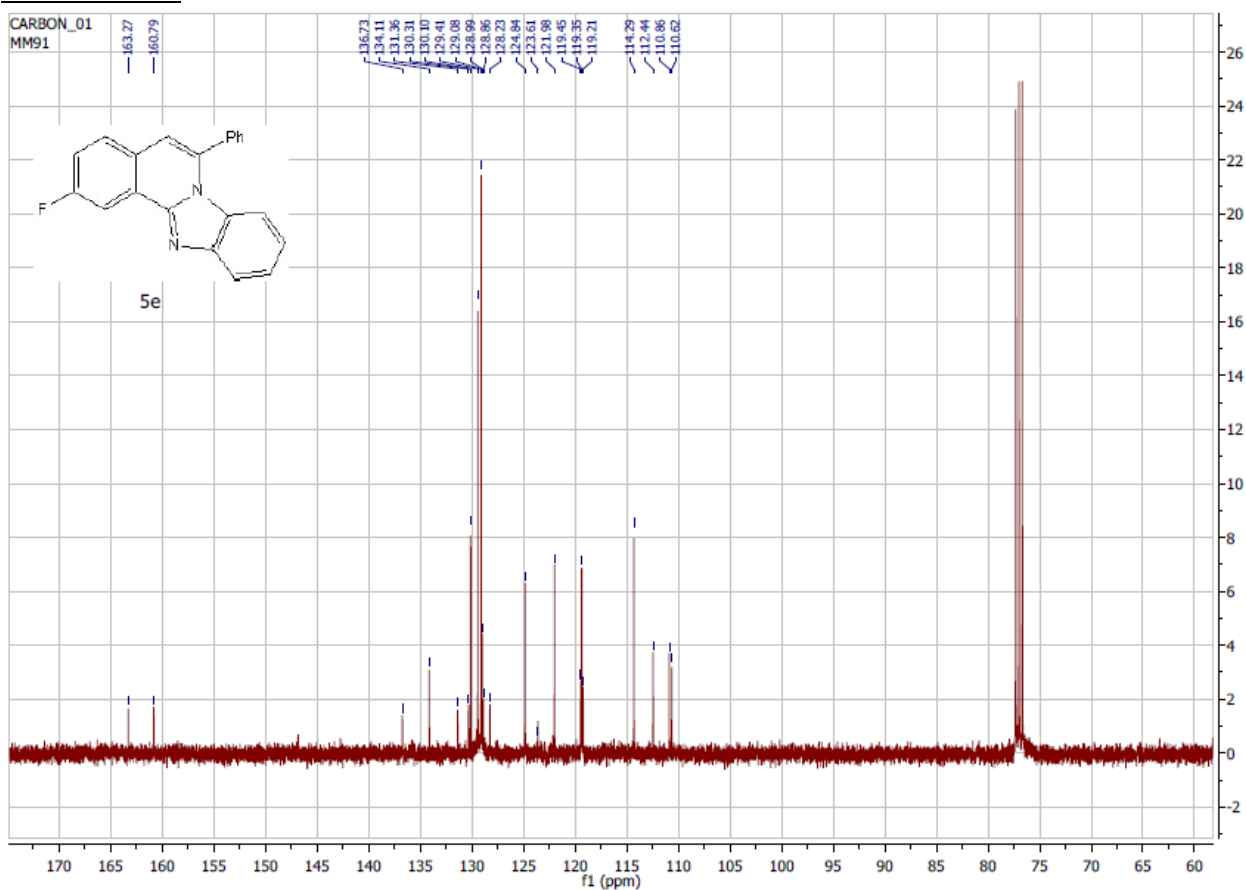

<sup>1</sup>H NMR of **5f**

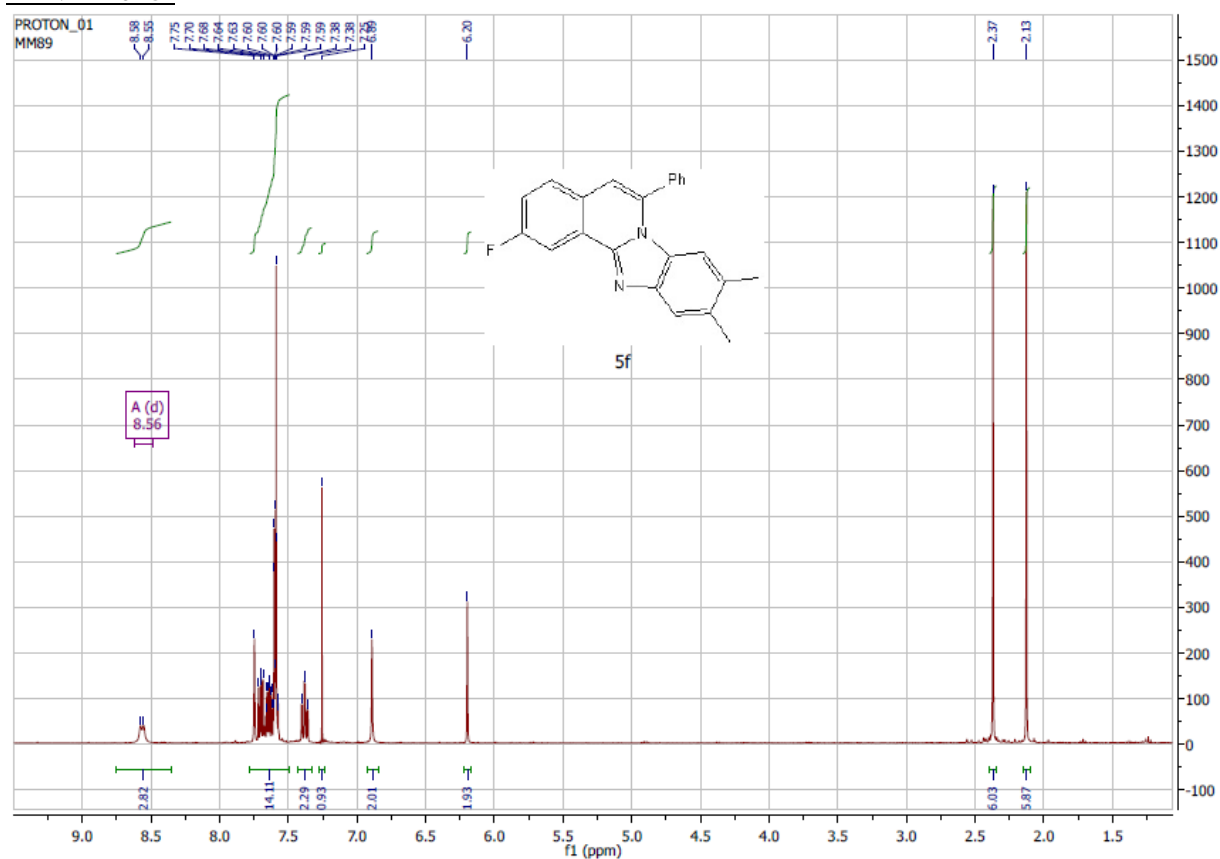

<sup>13</sup>C NMR of **5f**

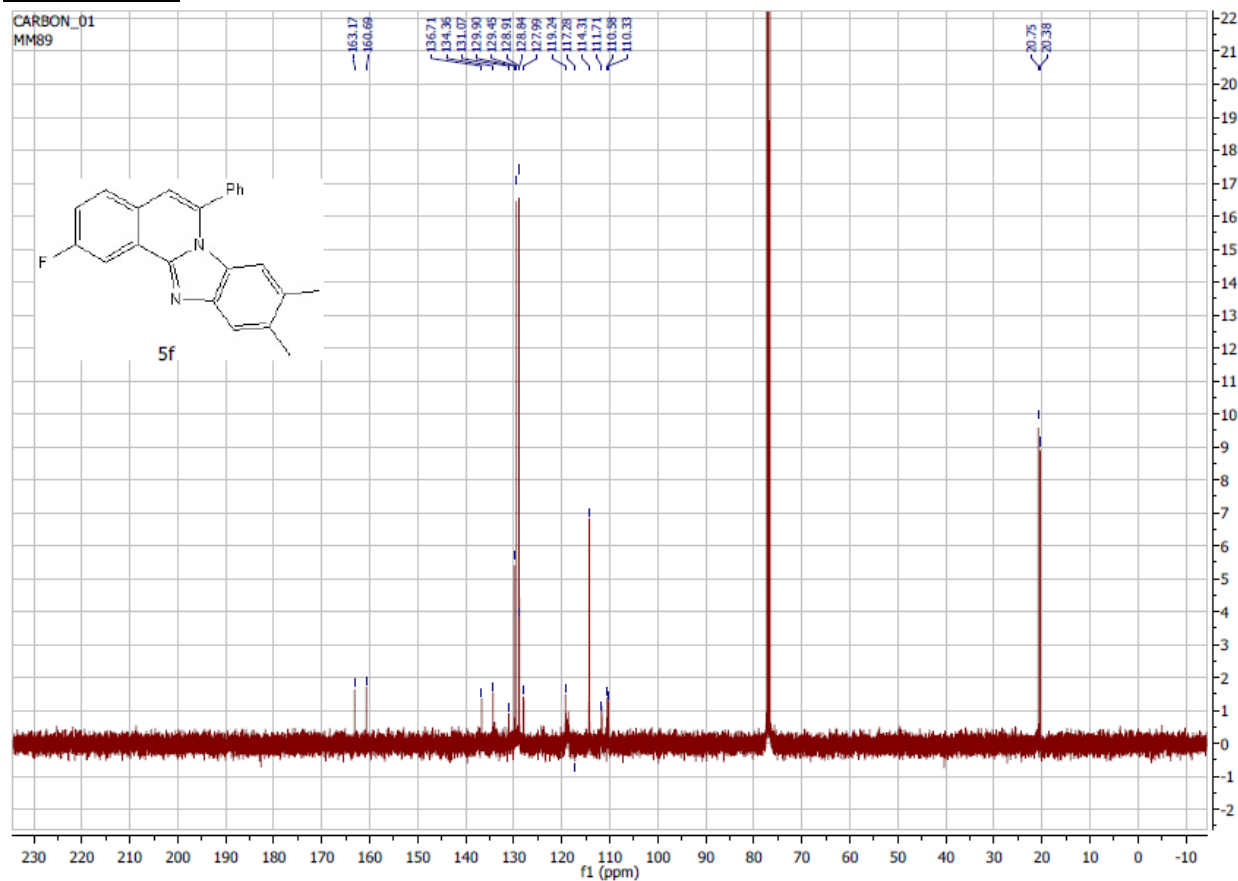

# <sup>1</sup>H NMR of **5g**

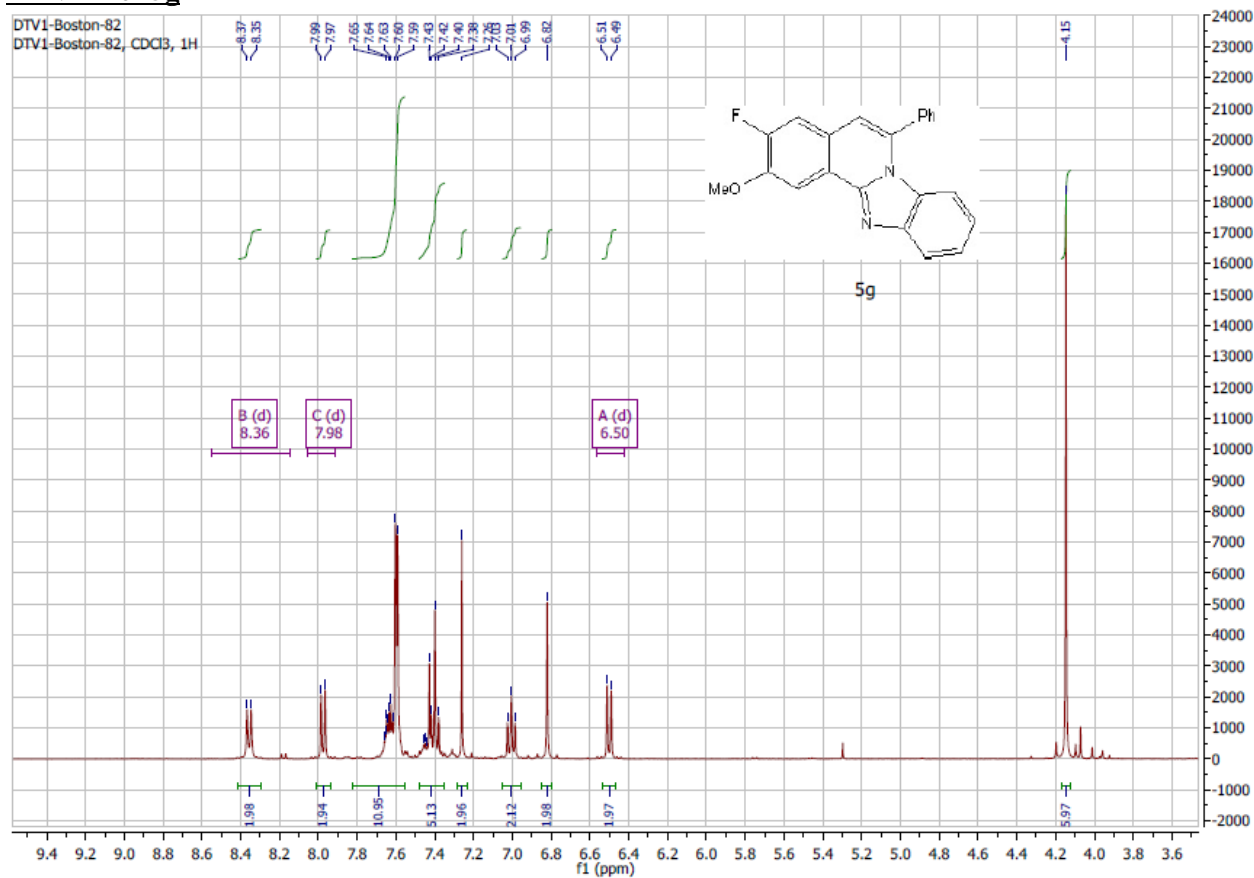

# <sup>13</sup>C NMR of **5g**

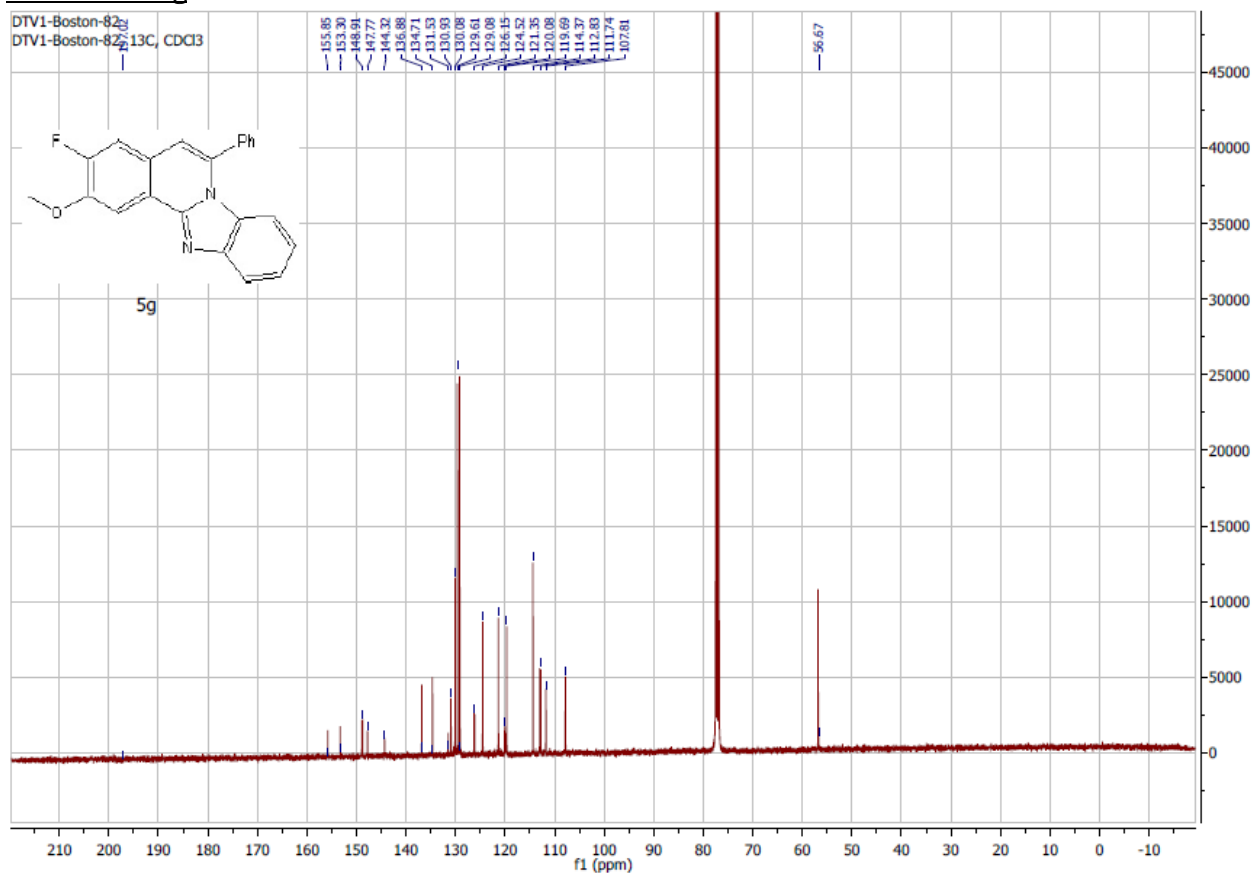

# <sup>1</sup>H NMR of 5h

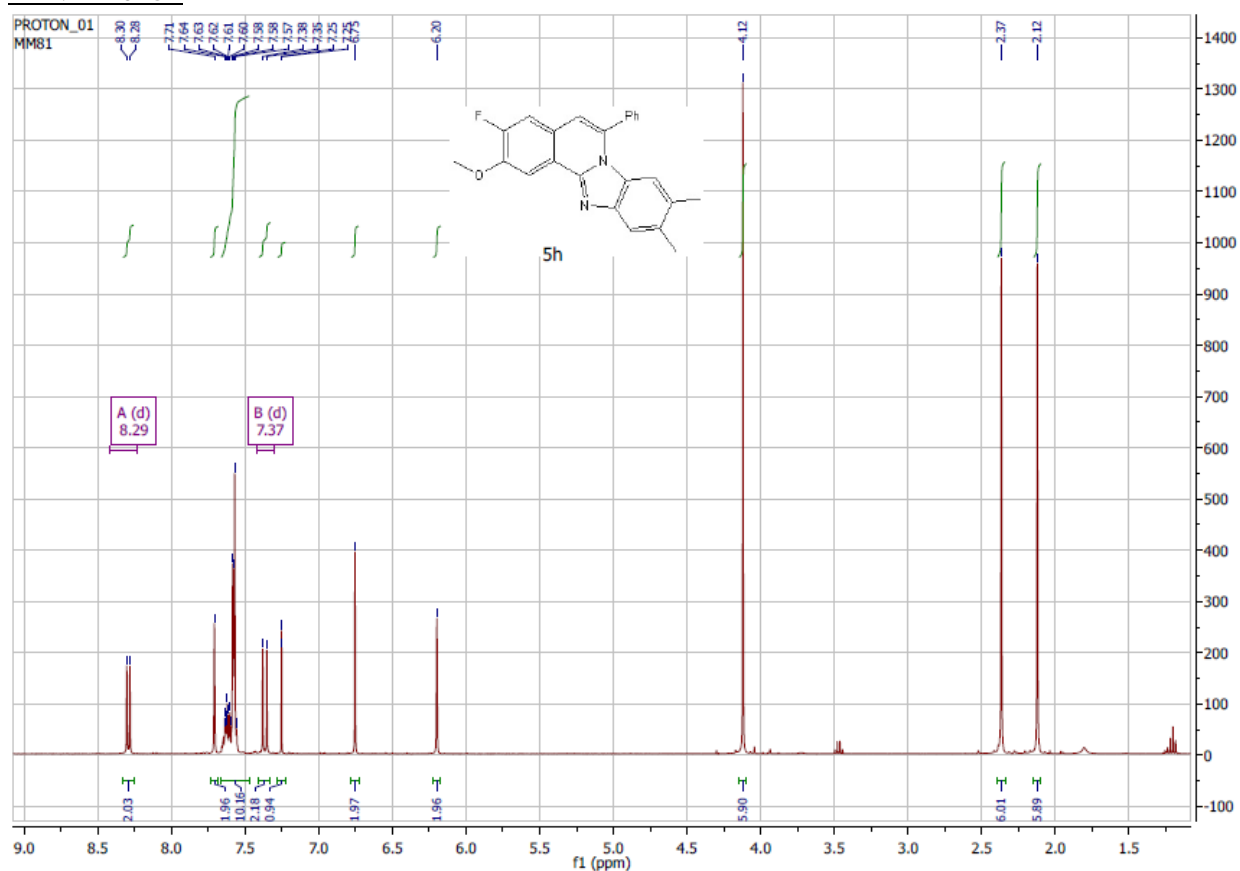

# <sup>13</sup>C NMR of 5h

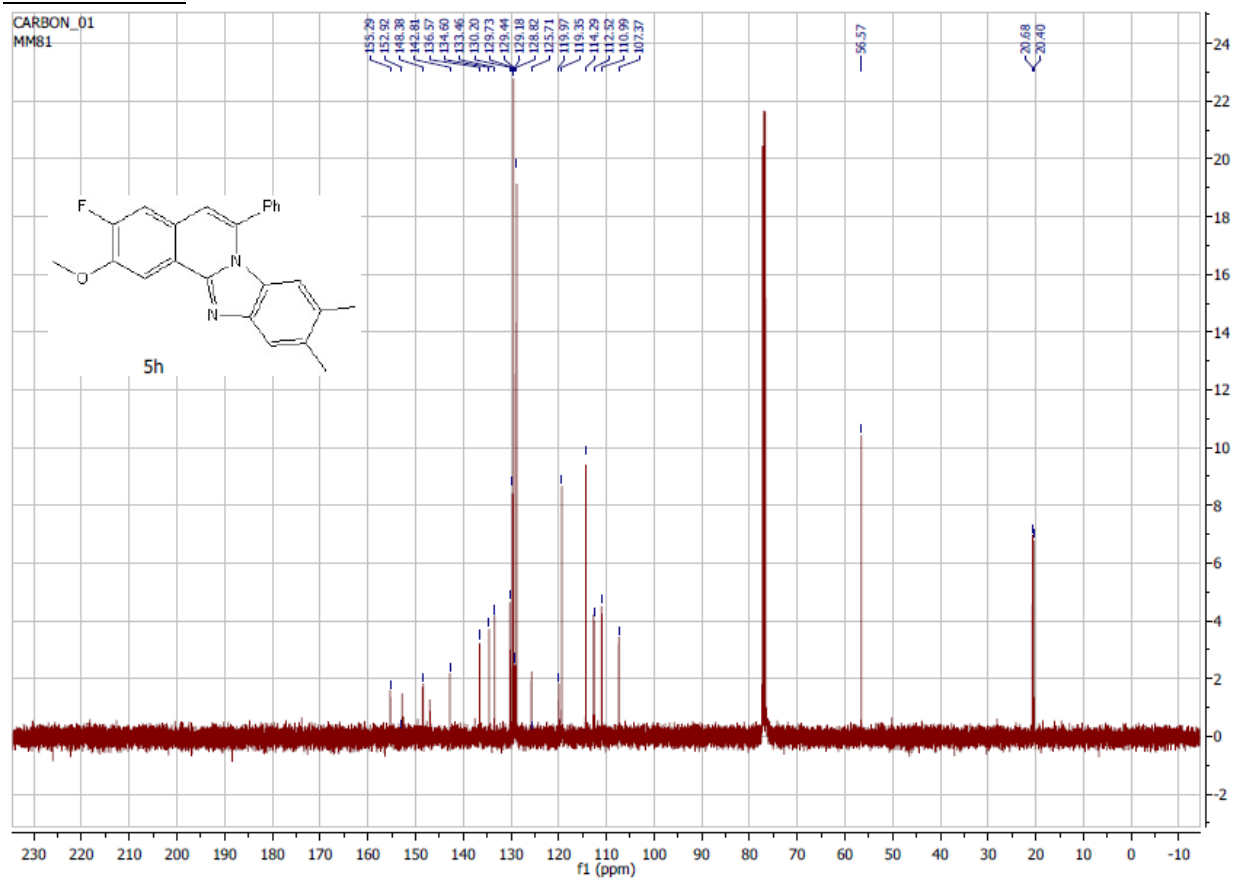



# <sup>1</sup>H NMR of **5i**

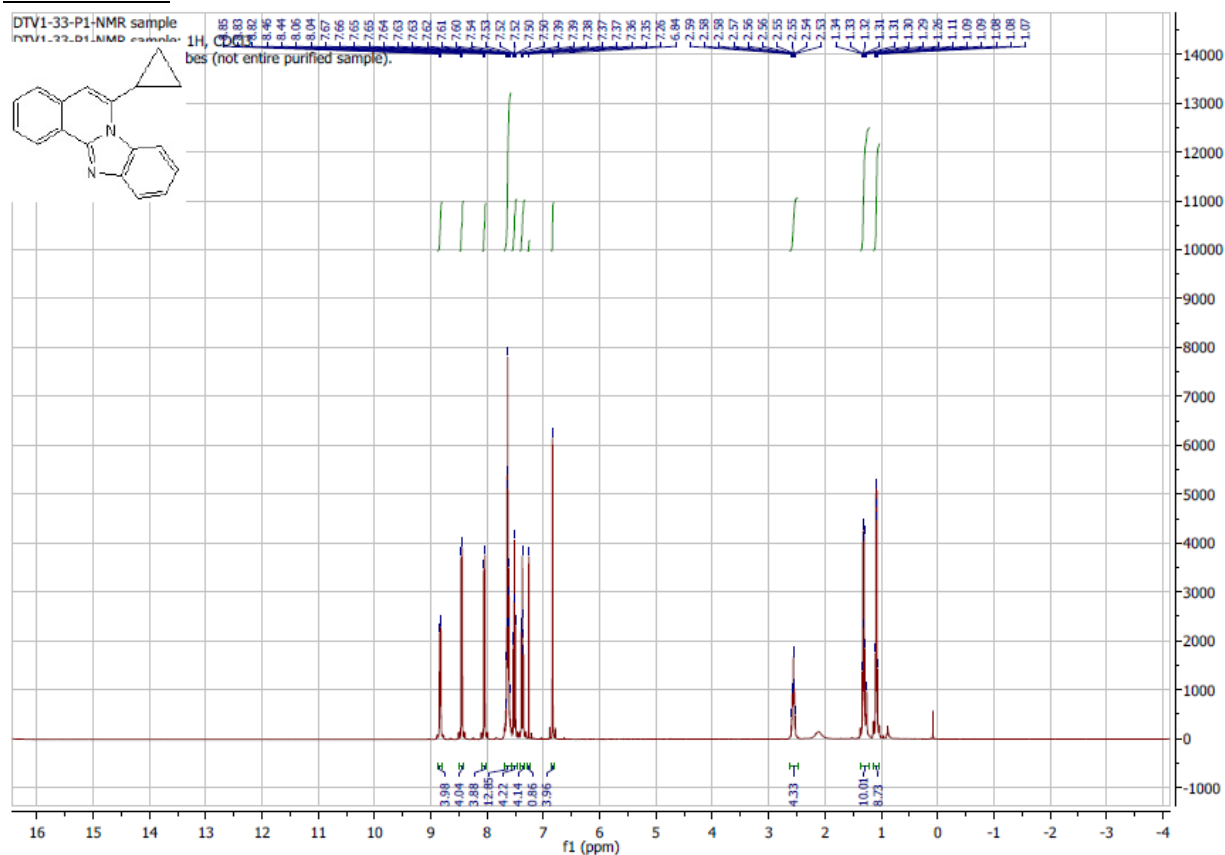

# <sup>13</sup>C NMR of **5i**

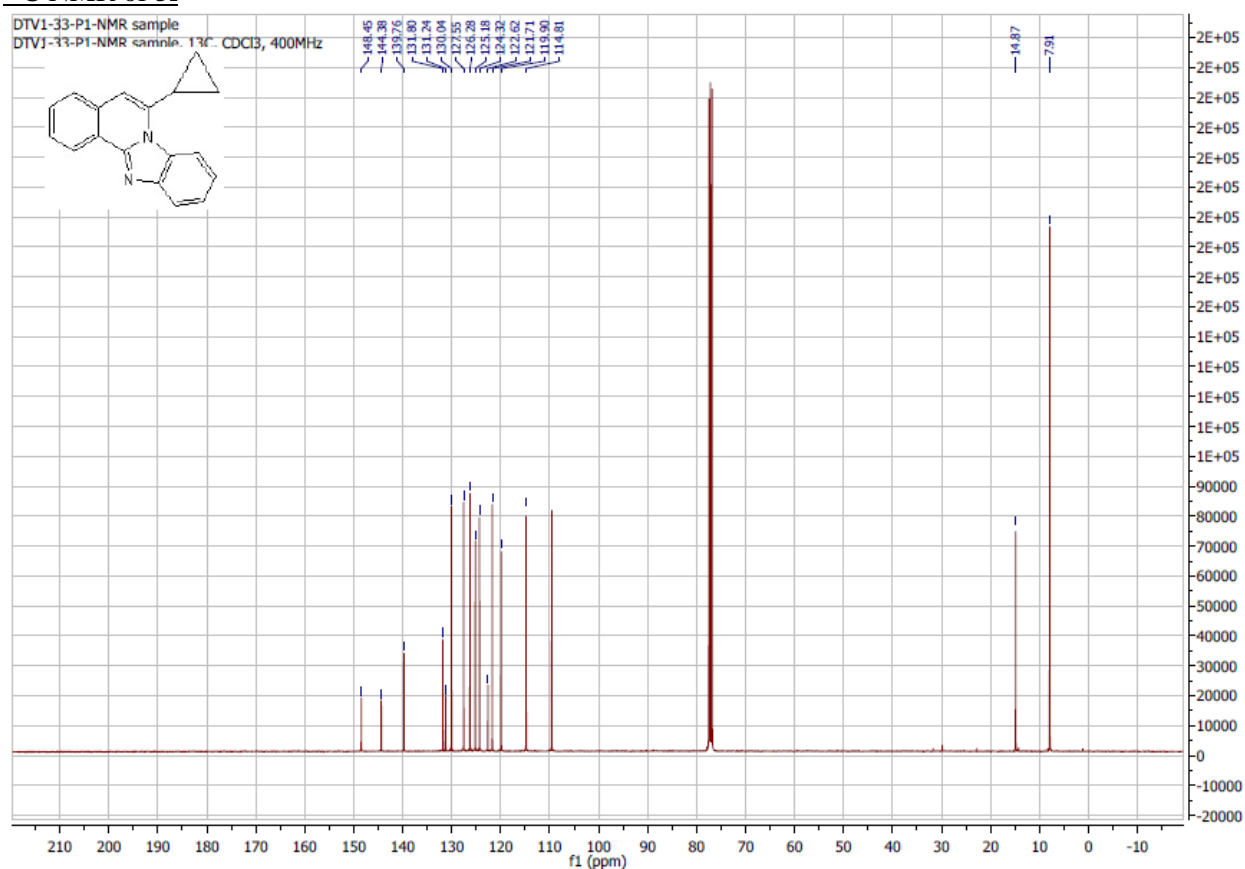

# <sup>1</sup>H NMR of **5i**

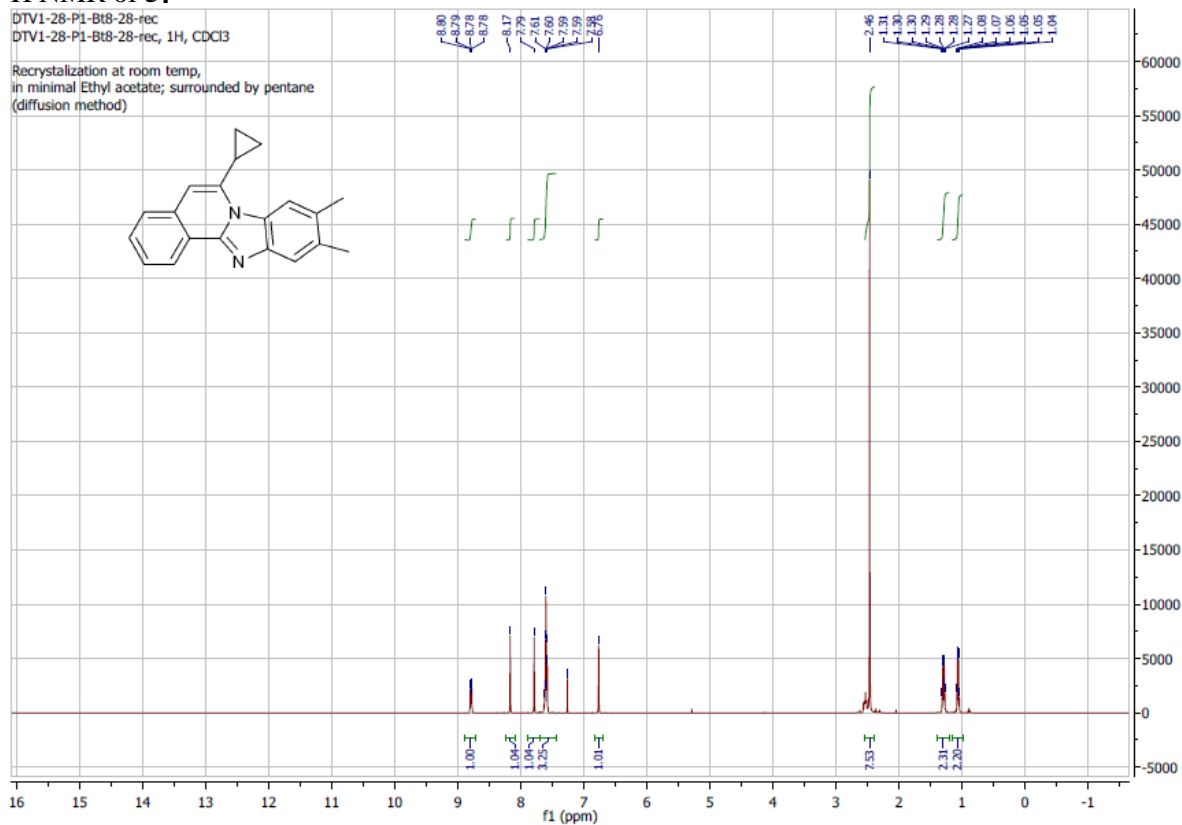

# <sup>13</sup>C NMR of **5i**

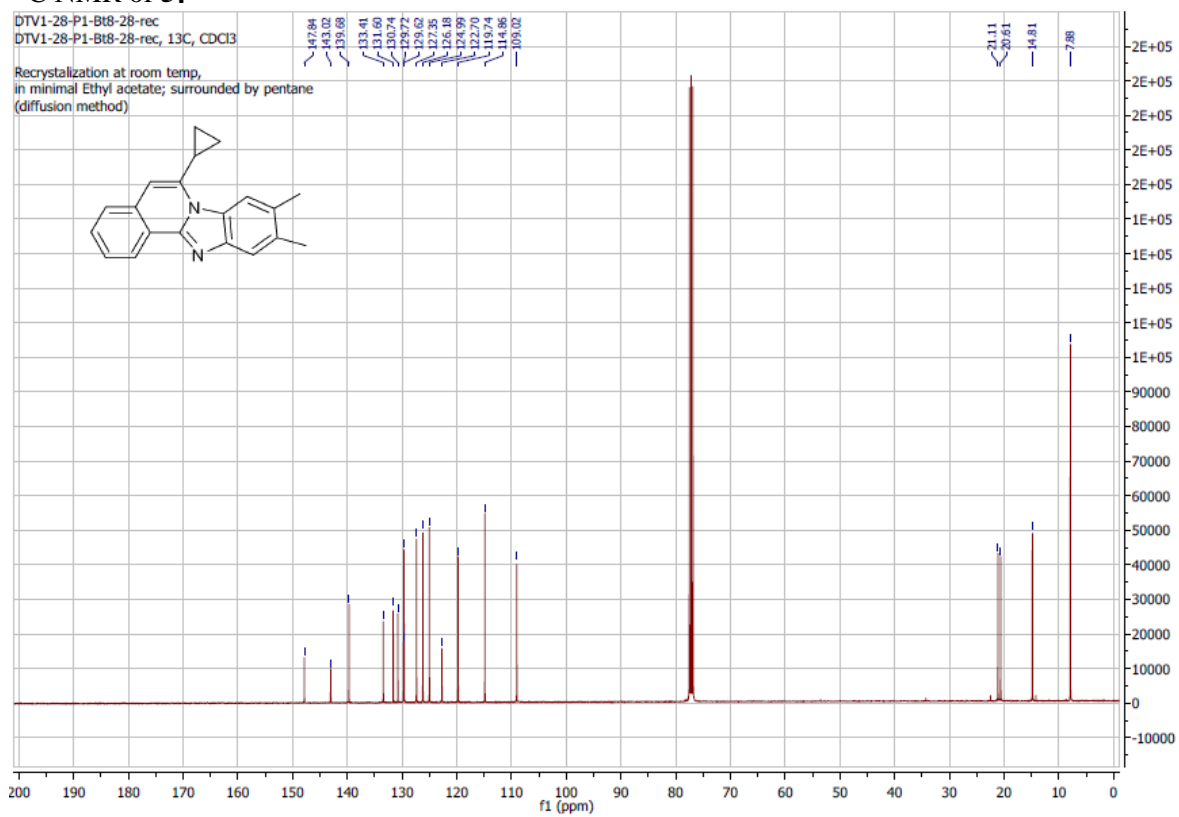

### <sup>1</sup>H NMR of **5k**

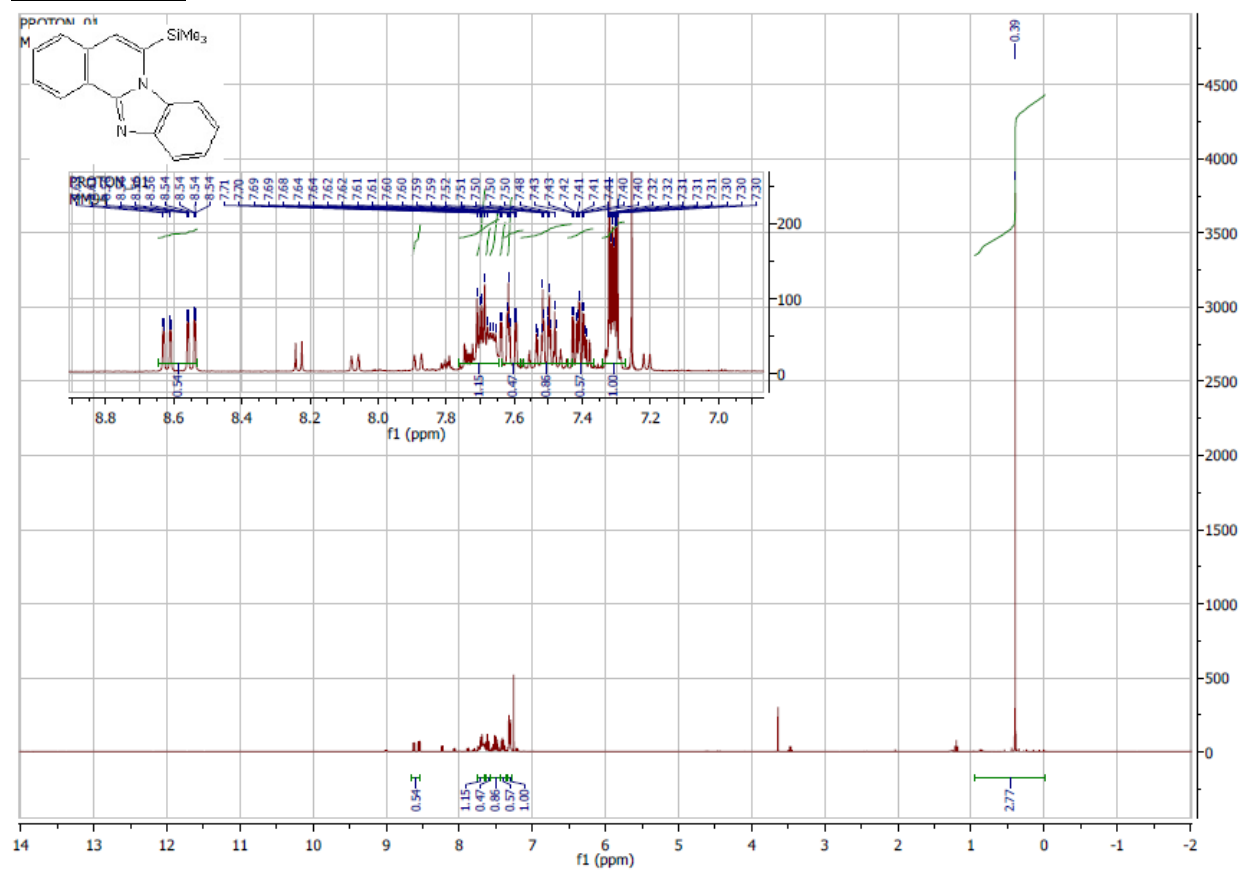

### <sup>13</sup>C NMR of **5k**

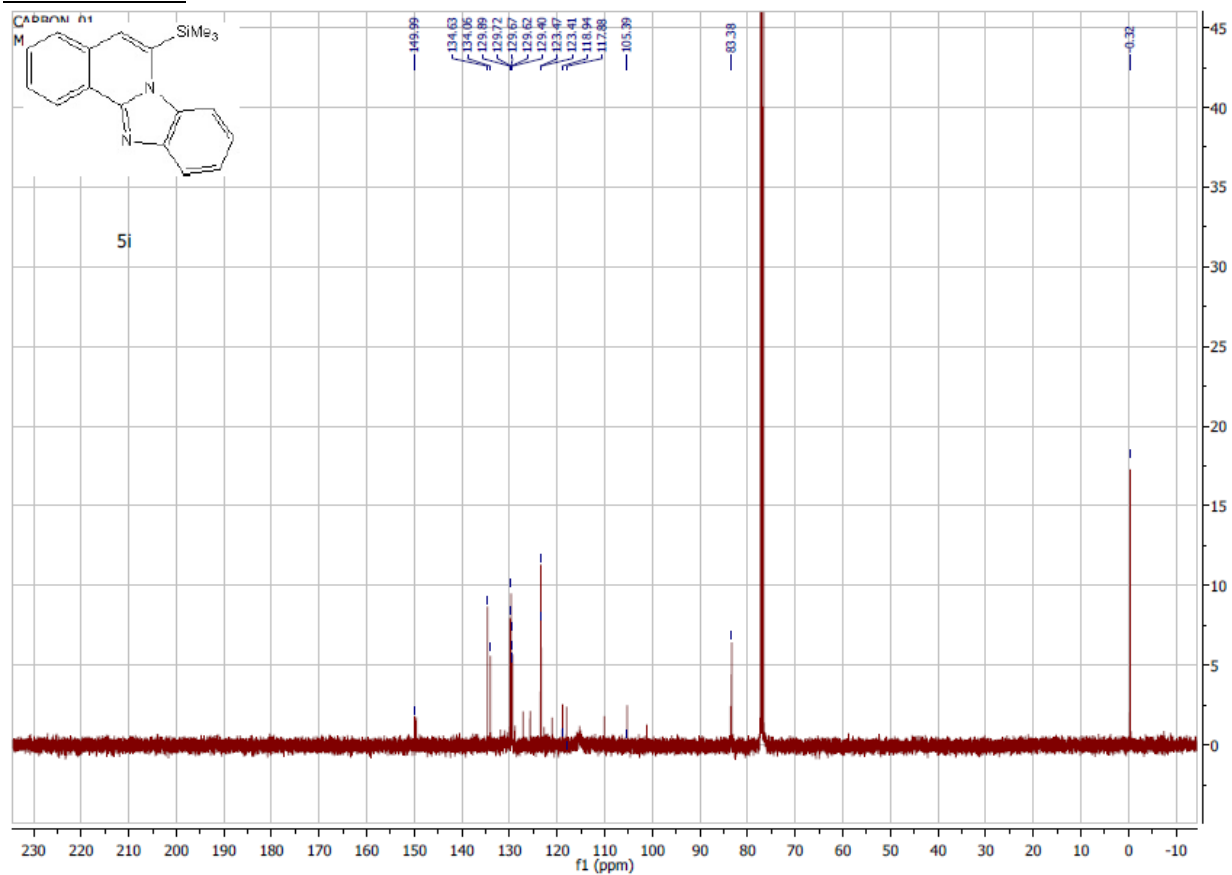

Chemical structure of compound 10 is shown in the top left corner. The structure is a benzimidazole derivative with a trimethylsilyl group and a methyl group.

The  $^1\text{H}$  NMR spectrum (CDCl<sub>3</sub>) is displayed below the structure. The x-axis represents the chemical shift in ppm, ranging from 0 to 14. The y-axis represents the intensity in arbitrary units, ranging from 0 to 15000. The spectrum shows several peaks, with the most prominent ones in the aromatic region (7.0-8.2 ppm) and a large peak at 0 ppm (TMS reference).

The inset shows a zoomed-in view of the aromatic region (7.0-8.2 ppm). The peaks are labeled with their chemical shifts (ppm): 7.61, 7.60, 7.59, 7.58, 7.57, 7.56, 7.55, 7.54, 7.53, 7.52, 7.51, 7.50, 7.49, 7.48, 7.47, 7.46, 7.45, 7.44, 7.43, 7.42, 7.41, 7.40, 7.39, 7.38, 7.37.

Integration values are provided for the main peaks: 0.18 (aromatic, ~8.2 ppm), 0.99 (aromatic, 7.3-7.6 ppm), 1.00 (aromatic, ~7.2 ppm), and 1.21 (TMS, 0 ppm).

CARBON\_01  
MM93P

Chemical structure of compound 10 is shown in the top left corner.

Peak list (ppm):

| Peak (ppm) |
|------------|
| 148.38     |
| 134.14     |
| 133.58     |
| 129.91     |
| 129.88     |
| 129.54     |
| 128.58     |
| 118.86     |
| 114.76     |
| 106.32     |
| 105.06     |
| 101.69     |
| 0.46       |
| -0.31      |

# <sup>1</sup>H NMR of **5m**

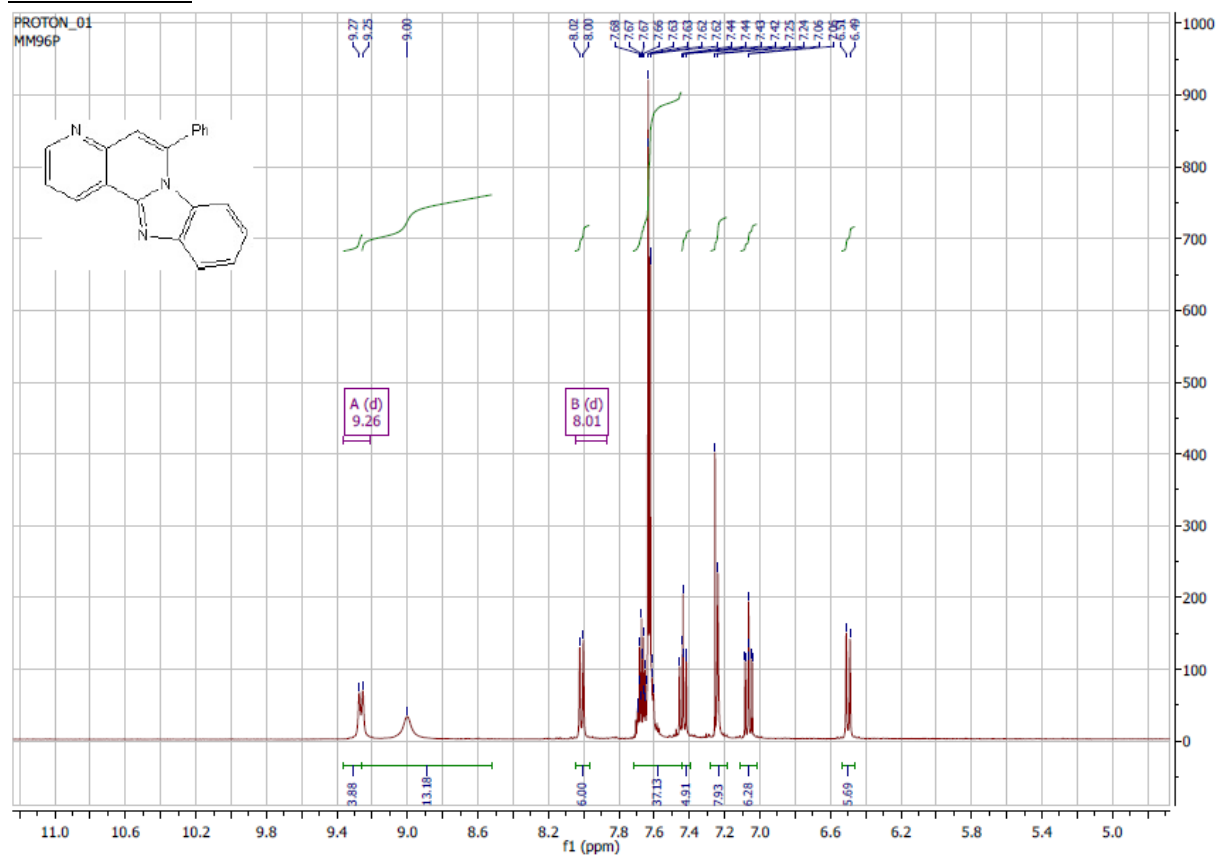

# <sup>13</sup>C NMR of **5m**

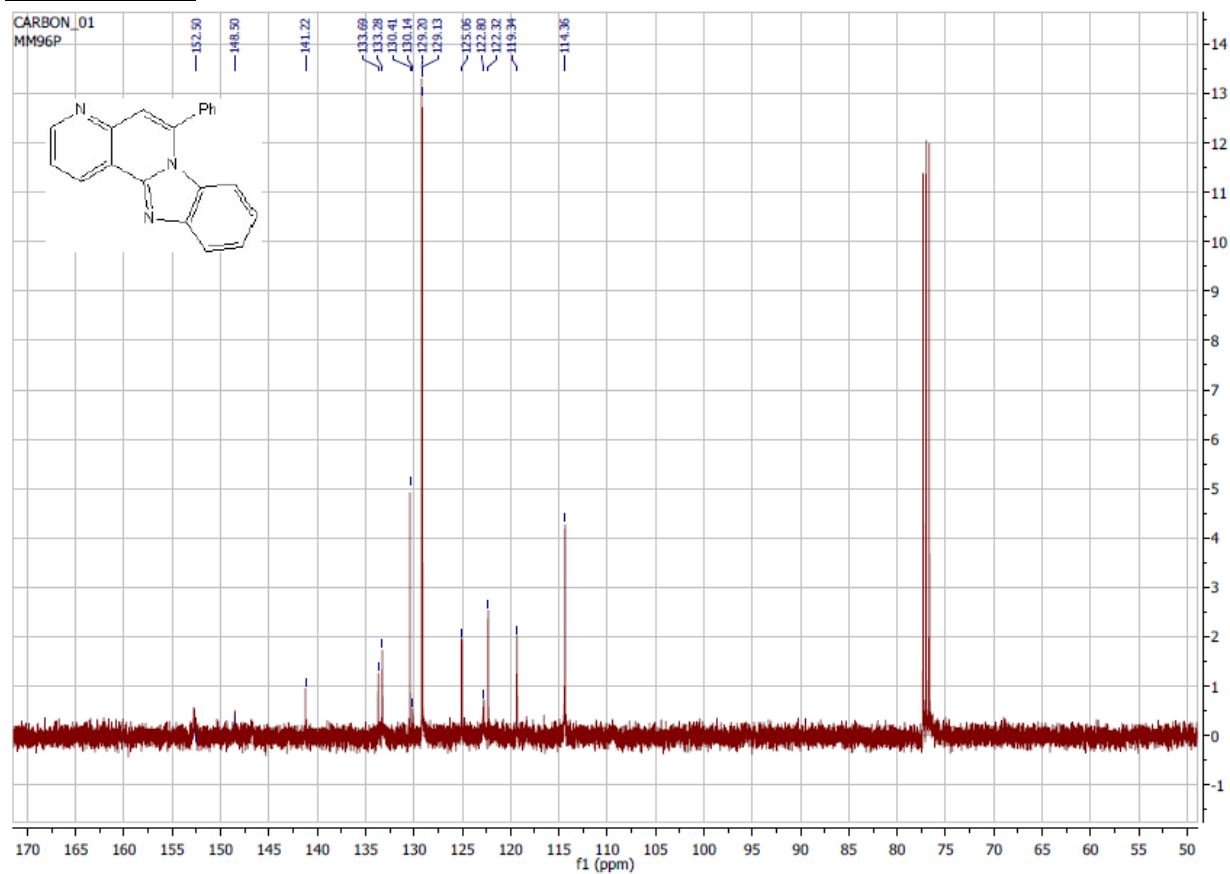

# <sup>1</sup>H NMR of **5n**

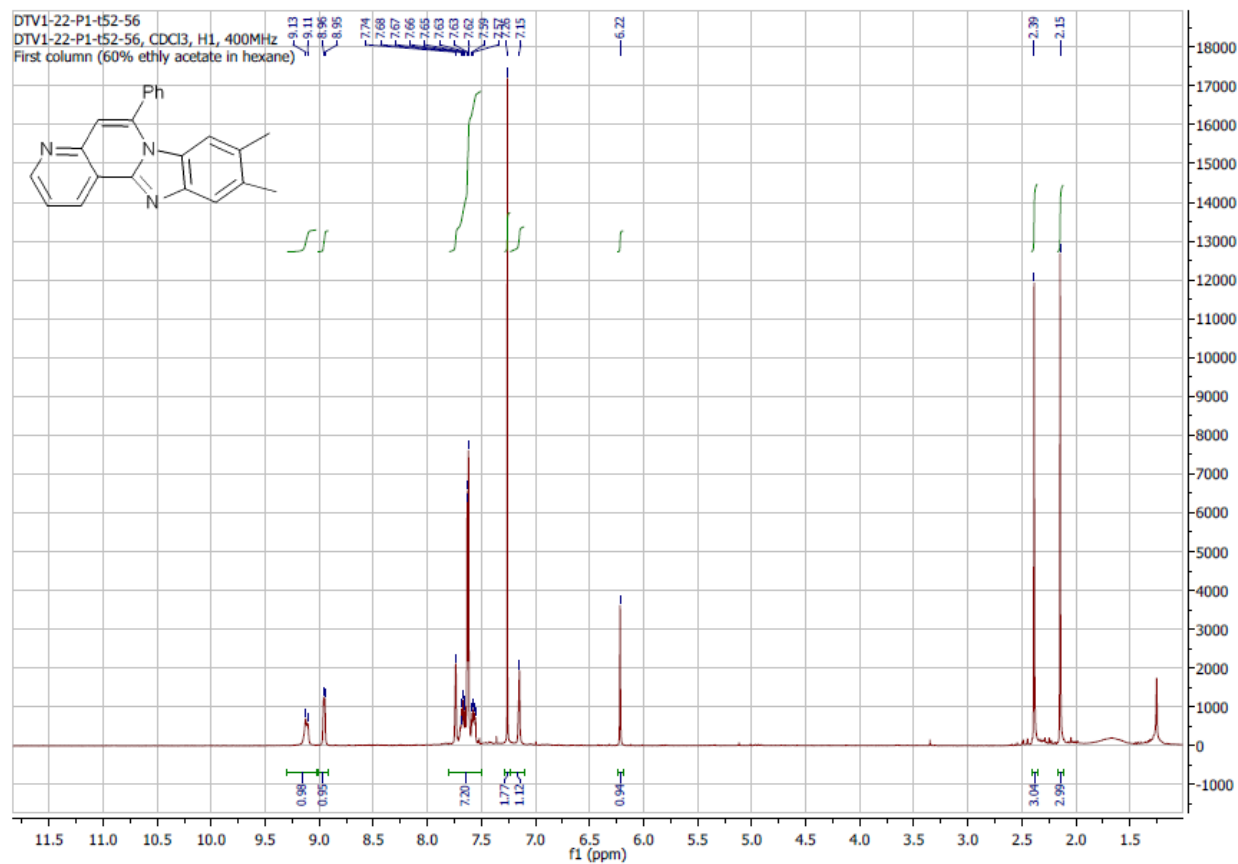

# <sup>13</sup>C NMR of **5n**

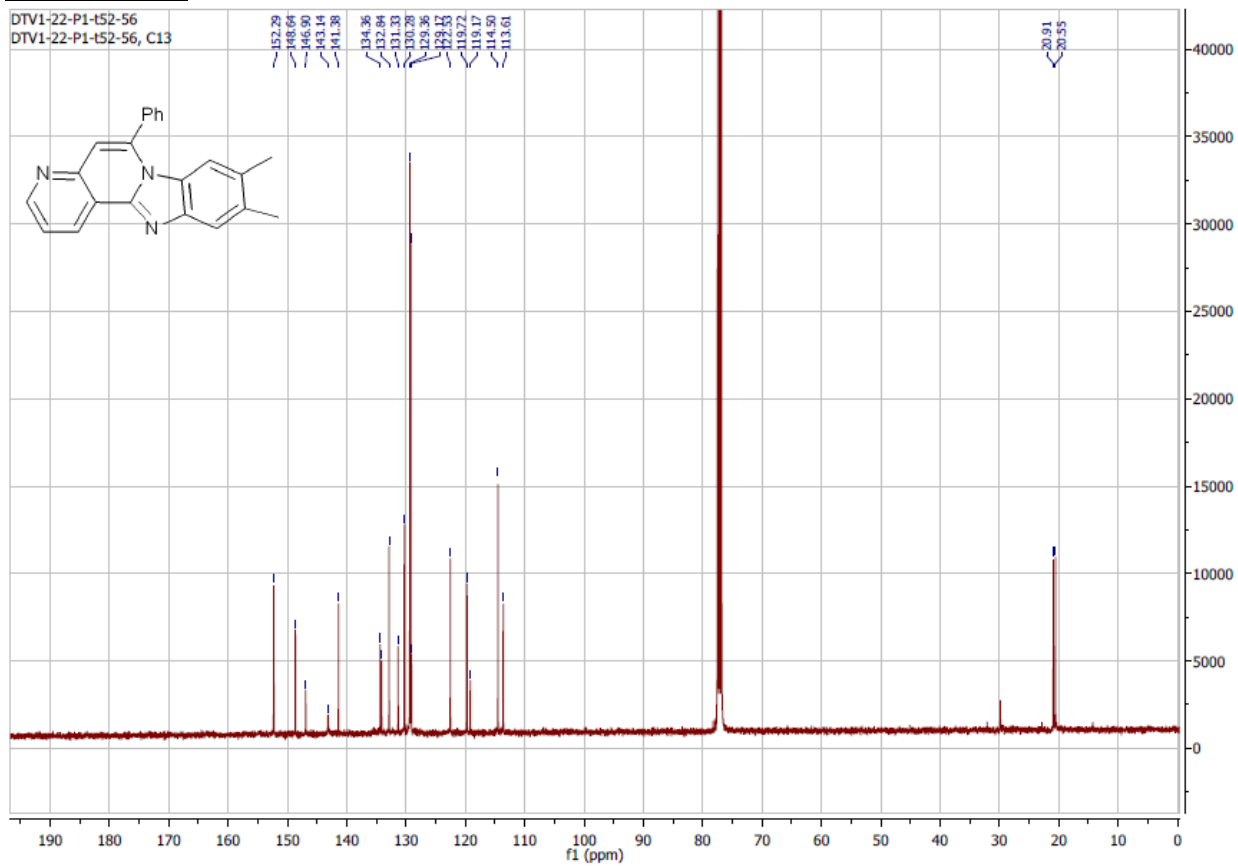



# <sup>1</sup>H NMR of 7b

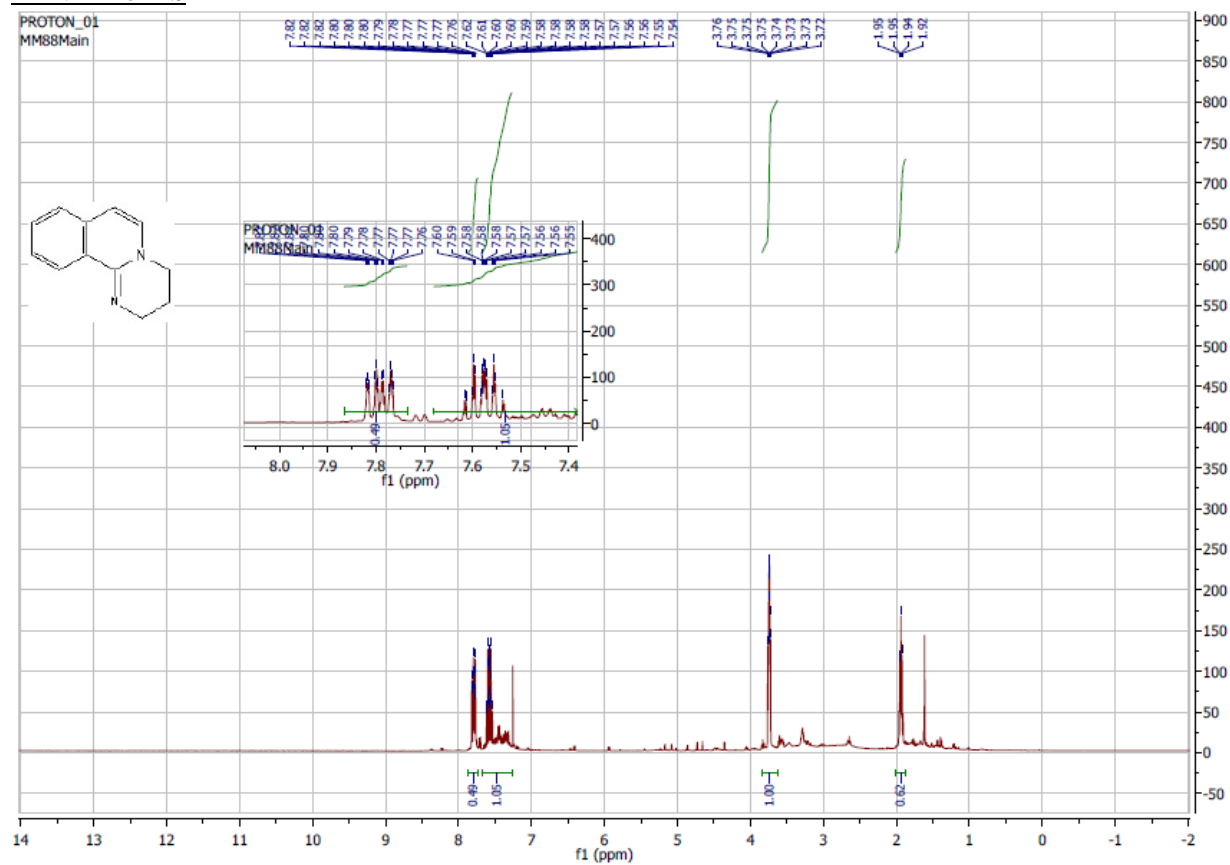

# <sup>13</sup>C NMR of 7b

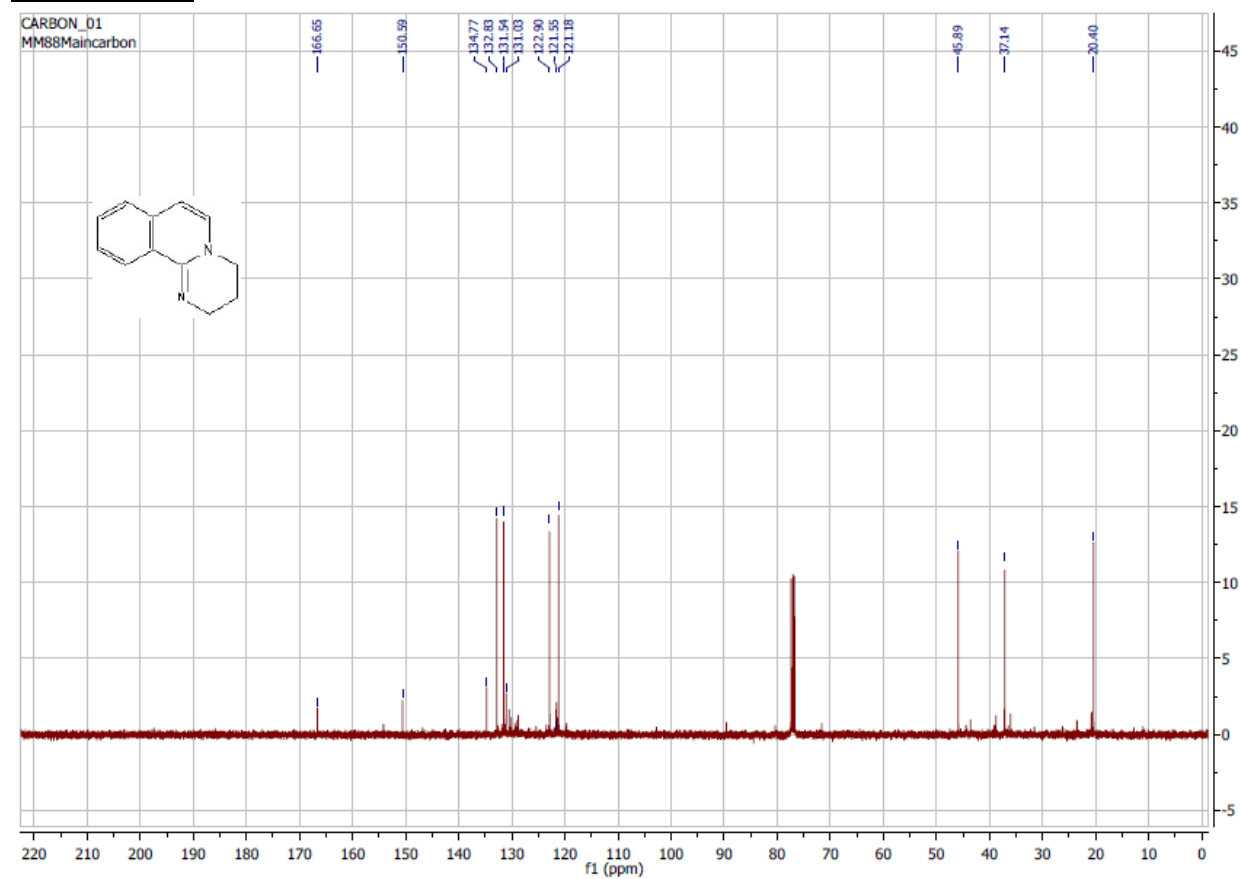



# <sup>1</sup>H NMR of 8e

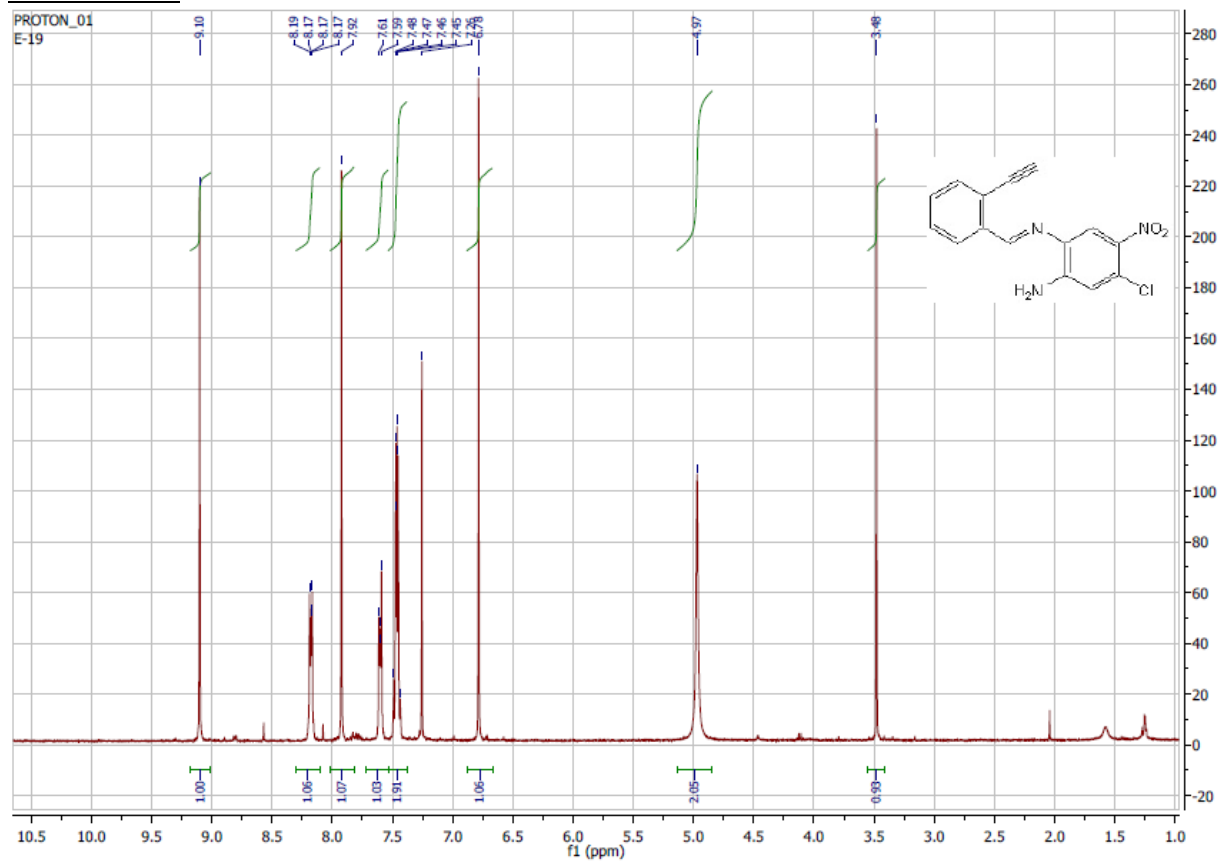

# <sup>13</sup>C NMR of 8e

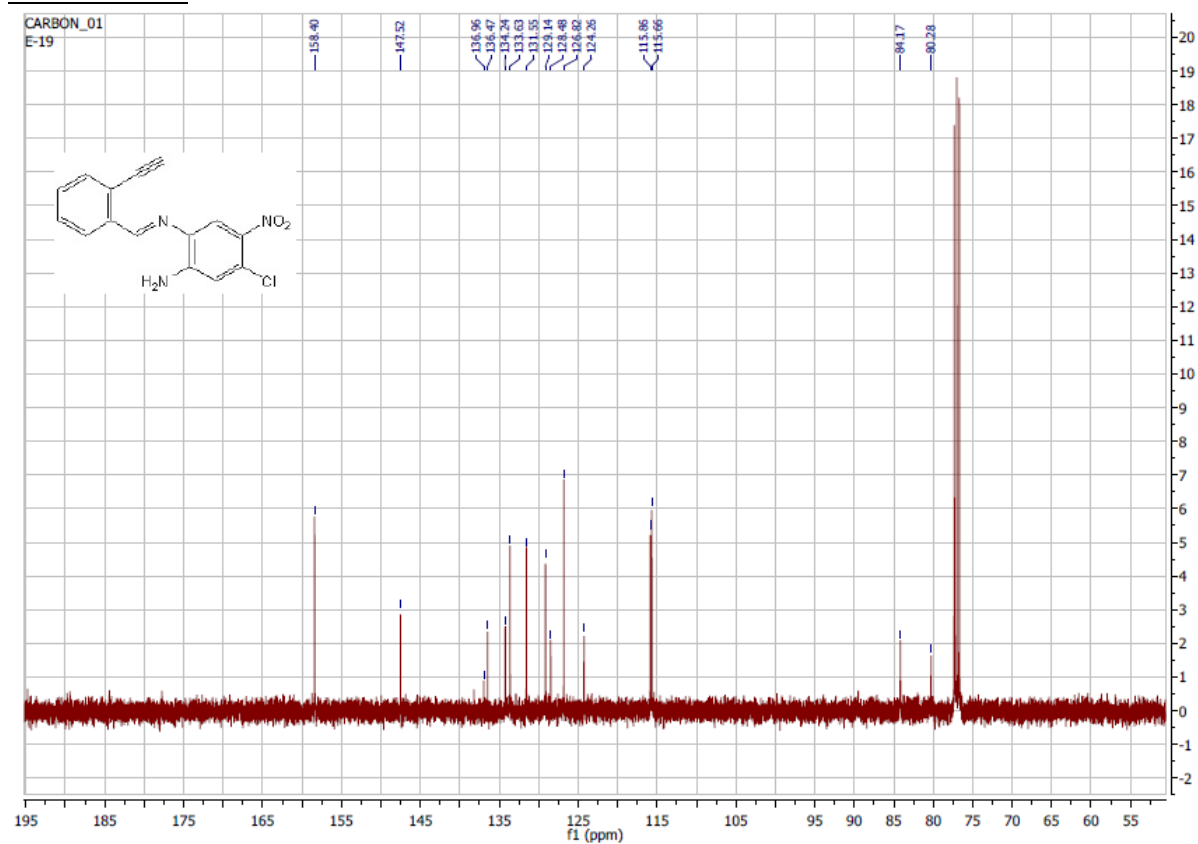

# <sup>1</sup>H NMR of **8f**

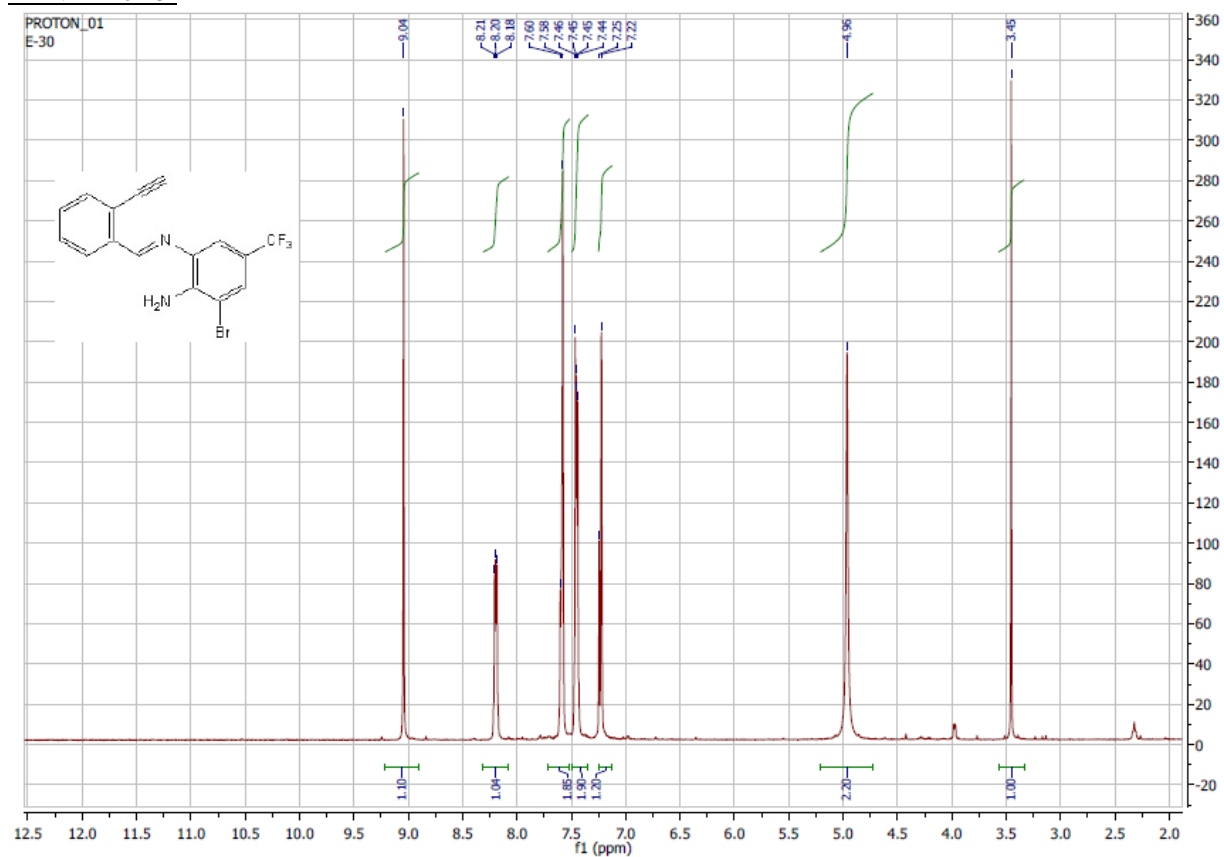

# <sup>13</sup>C NMR of **8f**

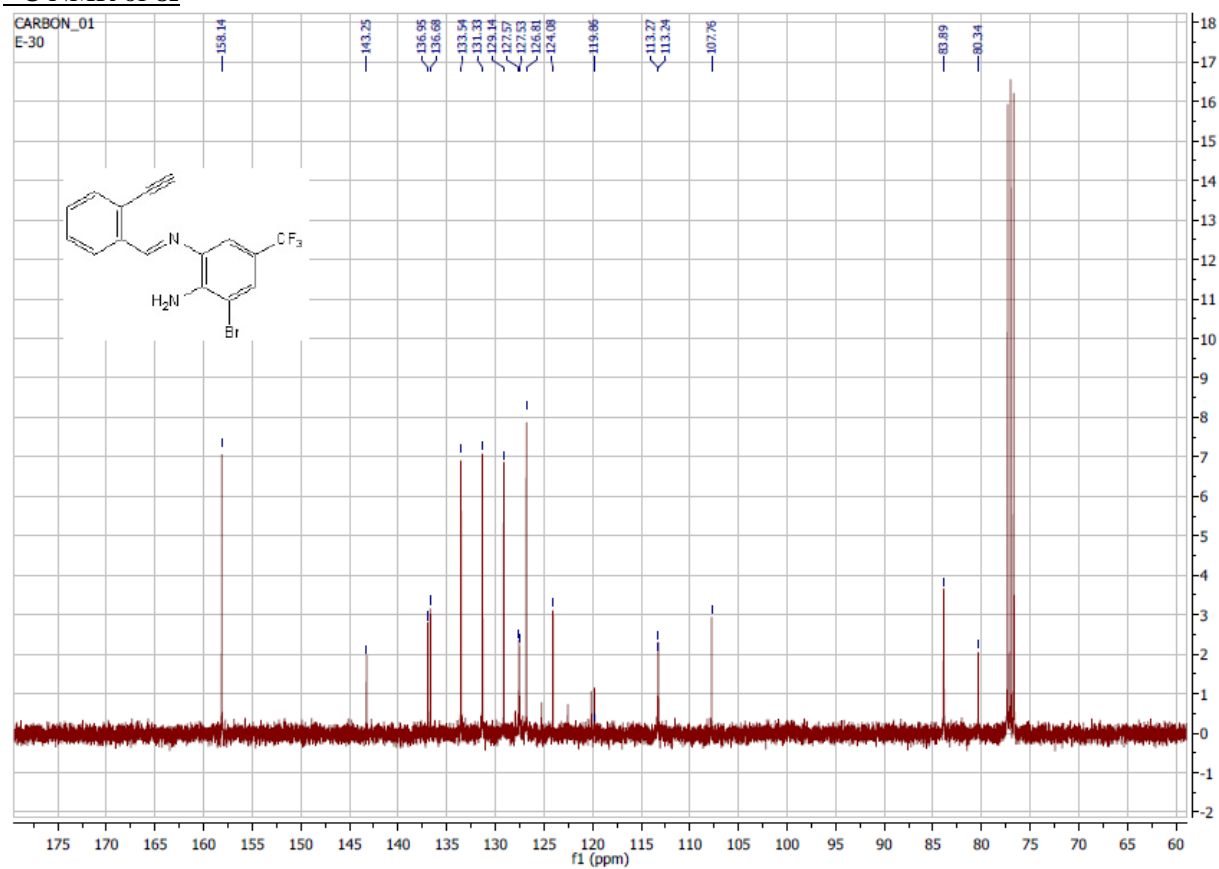

# <sup>1</sup>H NMR of 8g

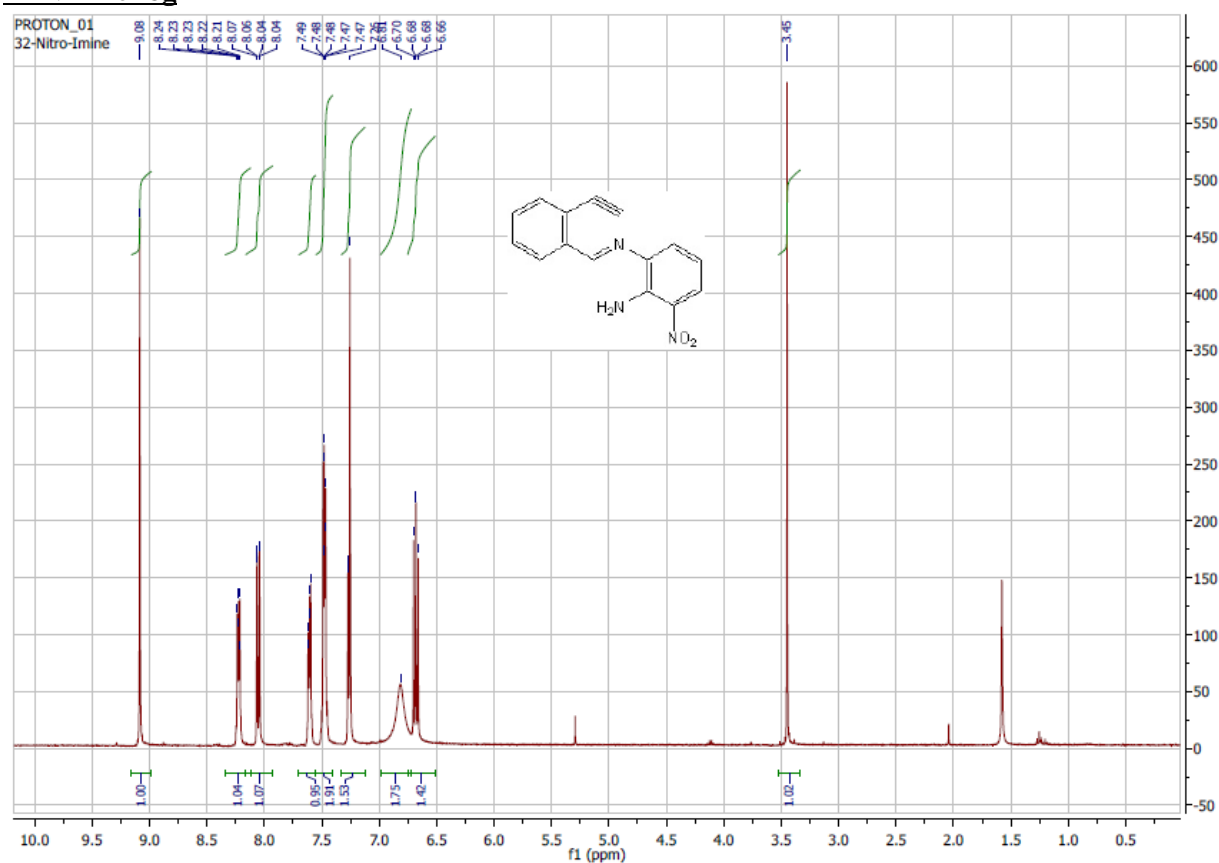

# <sup>13</sup>C NMR of 8g

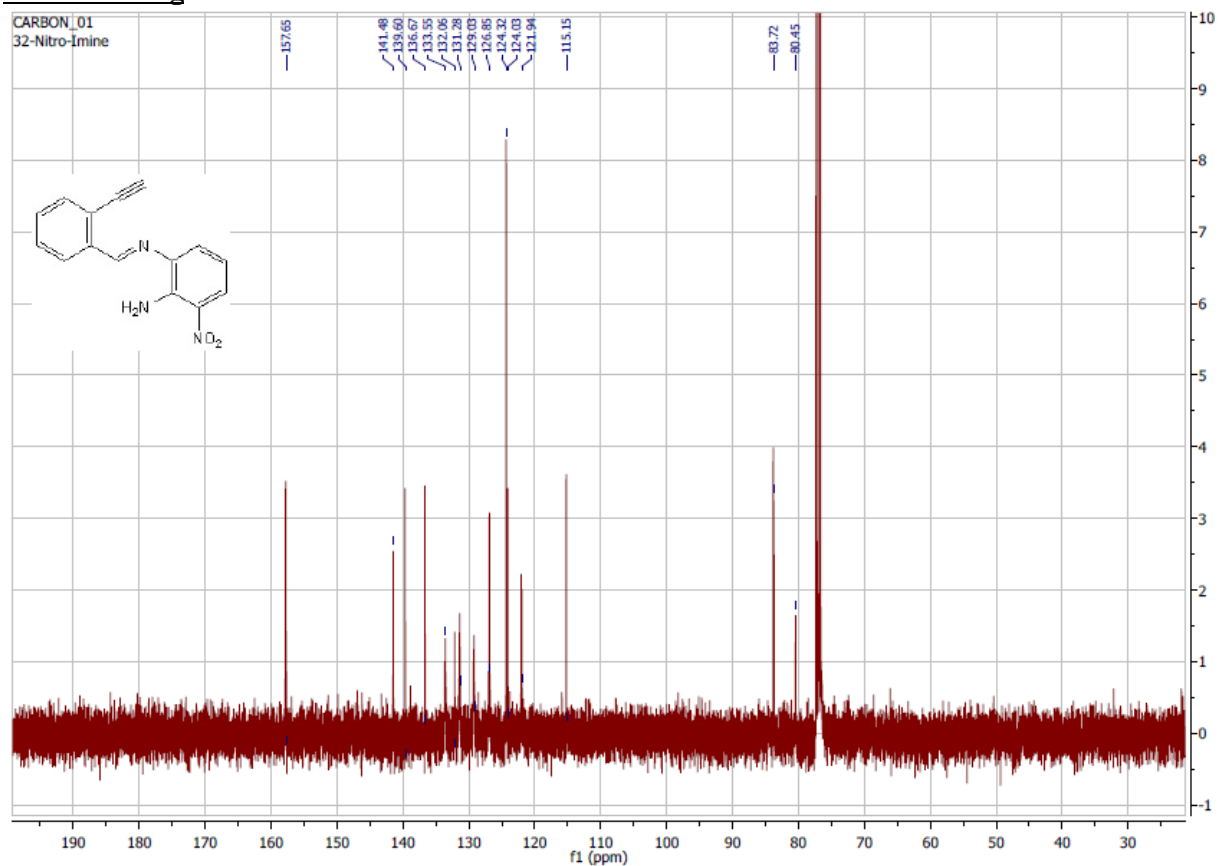

Supplement: c8gc02520g1.pdf [file c8gc02520g1.pdf]
